# Supplementary material for: An experimental and theoretical study on the regioselective synthesis of a new class of spiropyrrolothiazoles with quinoxaline motifs via a 1,3-dipolar cycloaddition reaction. An evaluation of DFT methods
Source: Royal Society of Chemistry journal article supplement (doi:10.1039/c5ra14071d), 2015-01-01
Supplement: c5ra14071d1.pdf [file c5ra14071d1.pdf]

## *Supplementary Information*

### **An experimental and theoretical study on the regioselective synthesis of a new class of spiropyrrolothiazoles with quinoxalines motifs via 1,3-dipolar cycloaddition reaction. An evaluation of DFT methods**

Mahshid Hamzehloueian, Yaghoub Sarrafi and Zahra Aghaei

| <b>Liste of contents</b>                                                          | <b>Page</b>  |
|-----------------------------------------------------------------------------------|--------------|
| <b>Calculated energies, charge transfer and synchronicity at B3LYP/6-31G(d,p)</b> | <b>2</b>     |
| <b>Calculated NICS</b>                                                            | <b>3</b>     |
| <b>Cartesian coordinates of TSs</b>                                               | <b>4-15</b>  |
| <b>Spectroscopic data of synthesized compounds</b>                                | <b>16-20</b> |
| <b><sup>1</sup>H- and <sup>13</sup>C-NMR Spectra of compounds 5a-m</b>            | <b>21-33</b> |

**Table S1.** Calculated electronic activation energies  $E_a$ , reaction Gibbs free energies  $\Delta G$ , reaction enthalpies  $\Delta H$ , reaction energies  $\Delta E_{rxn}$ , activation Gibbs free energies  $\Delta G^\ddagger$ , activation enthalpies  $\Delta H^\ddagger$  and Average Bond Index Changes ( $\delta B_{av}$ ), Synchronicities (Sy) and charge transfer (CT) of possible pathways of 1,3-DC of nitrostyrene **4a** and azomethine ylide **7** Indicated in Scheme 3 at B3LYP/6-31G(d,p), all energies are in kcal/mol.

| Structure         | $\Delta G^\ddagger$ | $E_a$ | $\Delta H^\ddagger$ | $\Delta E_{rxn}$ | $\Delta H$ | $\Delta G$ | $\delta B_{av}$ | Sy   | CT   |
|-------------------|---------------------|-------|---------------------|------------------|------------|------------|-----------------|------|------|
| <b>TS endo-5a</b> | 21.40               | 6.53  | 6.10                | -26.13           | -26.77     | -11.59     | 0.34            | 0.79 | 0.20 |
| <b>TS exo-5a</b>  | 22.66               | 8.54  | 8.34                | -19.36           | -20.11     | -4.32      | 0.29            | 0.67 | 0.16 |
| <b>TS endo-6a</b> | 19.63               | 4.88  | 4.55                | -24.11           | -24.75     | -9.66      | 0.21            | 0.37 | 0.26 |
| <b>TS exo-6a</b>  | 24.85               | 10.26 | 9.88                | -23.68           | -24.46     | -8.71      | 0.25            | 0.53 | 0.24 |

**Table S2.** Nucleus-independent chemical shifts (NICS, ppm/mol) at B3LYP/6-31G(d,p)

| Structure | <i>endo-5a</i> | <i>exo-5a</i> | <i>endo-6a</i> | <i>exo-6a</i> |
|-----------|----------------|---------------|----------------|---------------|
| TS        | -13.74         | -13.20        | -14.00         | -13.07        |
| product   | -6.83          | -2.85         | -3.75          | -6.60         |

Cartesian coordinates of **TS endo-5a** at B3LYP/6-31G(d,p)

| Center Number | Atomic Number | Coordinates (Angstroms) |           |           |
|---------------|---------------|-------------------------|-----------|-----------|
|               |               | X                       | Y         | Z         |
| 1             | 6             | -2.543111               | -2.767224 | 0.910038  |
| 2             | 1             | -3.363064               | -2.072938 | 1.098677  |
| 3             | 1             | -2.171489               | -3.195214 | 1.841101  |
| 4             | 6             | -2.439601               | -3.176216 | -1.688839 |
| 5             | 1             | -3.266750               | -2.748498 | -2.267143 |
| 6             | 1             | -1.892397               | -3.869121 | -2.333426 |
| 7             | 6             | -1.530471               | -2.106159 | -1.149528 |
| 8             | 1             | -0.618983               | -1.859708 | -1.681100 |
| 9             | 6             | -2.230813               | -0.076638 | -1.440180 |
| 10            | 1             | -1.922465               | 0.063806  | -2.467378 |
| 11            | 6             | -1.688700               | 0.673549  | -0.378853 |
| 12            | 1             | -2.341671               | 0.796374  | 0.477625  |
| 13            | 6             | -0.645616               | 1.684707  | -0.534168 |
| 14            | 6             | -0.438982               | 2.608277  | 0.511249  |
| 15            | 1             | -1.055344               | 2.541475  | 1.403125  |
| 16            | 6             | 0.531651                | 3.601141  | 0.412213  |
| 17            | 1             | 0.668267                | 4.302637  | 1.229941  |
| 18            | 6             | 1.324924                | 3.695668  | -0.732557 |
| 19            | 6             | 1.136552                | 2.786542  | -1.776941 |
| 20            | 1             | 1.750636                | 2.851014  | -2.670351 |
| 21            | 6             | 0.167104                | 1.793169  | -1.681296 |
| 22            | 1             | 0.045489                | 1.092960  | -2.501043 |
| 23            | 6             | -0.641559               | -1.127749 | 0.808221  |
| 24            | 6             | -0.679464               | -0.735155 | 2.229134  |
| 25            | 6             | -1.718454               | -0.708494 | 3.169666  |
| 26            | 1             | -2.715752               | -1.053302 | 2.924266  |
| 27            | 6             | -1.467817               | -0.204686 | 4.447634  |
| 28            | 1             | -2.273277               | -0.190096 | 5.175880  |
| 29            | 6             | -0.205663               | 0.289222  | 4.803710  |
| 30            | 1             | -0.040924               | 0.676368  | 5.804423  |
| 31            | 6             | 0.832679                | 0.291901  | 3.873653  |
| 32            | 1             | 1.816617                | 0.676465  | 4.122193  |
| 33            | 6             | 0.592230                | -0.216899 | 2.599441  |
| 34            | 6             | 1.489131                | -0.338571 | 1.457070  |
| 35            | 6             | 0.741647                | -0.914763 | 0.363411  |
| 36            | 6             | 2.619735                | -0.890609 | -0.911648 |
| 37            | 6             | 3.290389                | -1.162645 | -2.128055 |
| 38            | 1             | 2.718633                | -1.608610 | -2.935781 |
| 39            | 6             | 4.629949                | -0.866890 | -2.266364 |
| 40            | 1             | 5.137404                | -1.080088 | -3.202426 |
| 41            | 6             | 5.352781                | -0.286396 | -1.196671 |
| 42            | 1             | 6.407029                | -0.059522 | -1.323100 |
| 43            | 6             | 4.726994                | -0.011012 | 0.000185  |
| 44            | 1             | 5.257860                | 0.431606  | 0.836748  |
| 45            | 6             | 3.352948                | -0.305148 | 0.174763  |
| 46            | 7             | -1.441514               | -2.077731 | 0.205343  |
| 47            | 7             | -3.642794               | -0.386874 | -1.392814 |
| 48            | 7             | 2.760836                | -0.031732 | 1.379918  |
| 49            | 7             | 1.284024                | -1.183631 | -0.802744 |
| 50            | 8             | -4.230693               | -0.399872 | -0.301190 |
| 51            | 8             | -4.188003               | -0.672715 | -2.467976 |
| 52            | 1             | 2.082057                | 4.469826  | -0.811798 |
| 53            | 16            | -3.067630               | -4.105455 | -0.222751 |

Cartesian coordinates of **Ts exo-5a** at B3LYP/6-31G(d,p)

| Center Number | Atomic Number | Coordinates (Angstroms) |           |           |
|---------------|---------------|-------------------------|-----------|-----------|
|               |               | X                       | Y         | Z         |
| 1             | 6             | -1.911614               | -0.514521 | 2.591076  |
| 2             | 1             | -2.713571               | -0.162327 | 1.944789  |
| 3             | 1             | -1.778757               | 0.173170  | 3.430413  |
| 4             | 6             | -0.698478               | -2.870795 | 2.628450  |
| 5             | 1             | -0.823677               | -3.850664 | 2.162333  |
| 6             | 1             | -0.030037               | -2.976269 | 3.490141  |
| 7             | 6             | -0.170181               | -1.871708 | 1.644298  |
| 8             | 1             | 0.877407                | -1.920985 | 1.359452  |
| 9             | 6             | -0.877284               | -2.303155 | -0.261490 |
| 10            | 6             | -0.973359               | -1.132225 | -1.023104 |
| 11            | 6             | -0.186048               | 0.431468  | 1.064192  |
| 12            | 6             | -0.760181               | 1.773474  | 0.911429  |
| 13            | 6             | -2.000986               | 2.341202  | 1.242759  |
| 14            | 1             | -2.773648               | 1.782659  | 1.752611  |
| 15            | 6             | -2.259614               | 3.674336  | 0.917072  |
| 16            | 1             | -3.222191               | 4.100660  | 1.183505  |
| 17            | 6             | -1.311940               | 4.466222  | 0.259235  |
| 18            | 1             | -1.540989               | 5.500101  | 0.020497  |
| 19            | 6             | -0.074180               | 3.923769  | -0.085166 |
| 20            | 1             | 0.683846                | 4.512766  | -0.591619 |
| 21            | 6             | 0.192867                | 2.598713  | 0.241203  |
| 22            | 6             | 1.401793                | 1.820125  | 0.018360  |
| 23            | 6             | 1.180189                | 0.493797  | 0.549676  |
| 24            | 6             | 3.313638                | -0.060582 | -0.004196 |
| 25            | 6             | 4.372114                | -0.999821 | -0.054376 |
| 26            | 1             | 4.193060                | -1.988420 | 0.355129  |
| 27            | 6             | 5.579262                | -0.656795 | -0.624786 |
| 28            | 1             | 6.384460                | -1.384266 | -0.663721 |
| 29            | 6             | 5.779381                | 0.635248  | -1.167492 |
| 30            | 1             | 6.736914                | 0.887025  | -1.613214 |
| 31            | 6             | 4.766976                | 1.570665  | -1.134506 |
| 32            | 1             | 4.893496                | 2.567864  | -1.543606 |
| 33            | 6             | 3.515872                | 1.250215  | -0.555876 |
| 34            | 7             | -0.644028               | -0.607451 | 1.837078  |
| 35            | 7             | 2.529927                | 2.203284  | -0.525957 |
| 36            | 7             | 2.121520                | -0.428431 | 0.558223  |
| 37            | 1             | -1.760155               | -2.849897 | 0.046341  |
| 38            | 1             | -0.100577               | -0.863559 | -1.606953 |
| 39            | 7             | 0.177951                | -3.262280 | -0.606371 |
| 40            | 8             | 0.033229                | -4.407776 | -0.157943 |
| 41            | 8             | 1.145740                | -2.894826 | -1.269425 |
| 42            | 6             | -2.208047               | -0.422466 | -1.303031 |
| 43            | 6             | -2.180461               | 0.671370  | -2.196739 |
| 44            | 6             | -3.459519               | -0.785188 | -0.752444 |
| 45            | 6             | -3.341150               | 1.361783  | -2.529680 |
| 46            | 1             | -1.231262               | 0.970127  | -2.632375 |
| 47            | 6             | -4.617265               | -0.090315 | -1.087430 |
| 48            | 1             | -3.530989               | -1.627177 | -0.070119 |
| 49            | 6             | -4.568360               | 0.985038  | -1.979670 |
| 50            | 1             | -3.288194               | 2.195736  | -3.223361 |
| 51            | 1             | -5.567134               | -0.396456 | -0.658075 |
| 52            | 1             | -5.475568               | 1.520250  | -2.242770 |
| 53            | 16            | -2.335484               | -2.212252 | 3.151557  |

Cartesian coordinates of **TS endo-6a** at B3LYP/6-31G(d,p)

| Center Number | Atomic Number | Coordinates (Angstroms) |           |           |
|---------------|---------------|-------------------------|-----------|-----------|
|               |               | X                       | Y         | Z         |
| 1             | 6             | 0.363166                | -2.538377 | 2.321063  |
| 2             | 1             | 0.687534                | -3.271858 | 1.583268  |
| 3             | 1             | -0.584449               | -2.829094 | 2.773720  |
| 4             | 6             | 2.304933                | -0.801077 | 2.772974  |
| 5             | 1             | 3.308609                | -0.995761 | 2.383457  |
| 6             | 1             | 2.381219                | 0.009065  | 3.503857  |
| 7             | 6             | 1.338212                | -0.454005 | 1.671520  |
| 8             | 1             | 1.183356                | 0.589139  | 1.423786  |
| 9             | 6             | 2.182855                | -0.890762 | -0.231403 |
| 10            | 6             | 1.099522                | -1.029171 | -1.098882 |
| 11            | 6             | -0.831342               | -0.946132 | 0.828124  |
| 12            | 6             | -1.937662               | -1.832771 | 0.454095  |
| 13            | 6             | -2.077416               | -3.227589 | 0.469220  |
| 14            | 1             | -1.281065               | -3.876707 | 0.805067  |
| 15            | 6             | -3.259681               | -3.795342 | -0.011948 |
| 16            | 1             | -3.365350               | -4.875768 | -0.001173 |
| 17            | 6             | -4.296011               | -3.006046 | -0.521845 |
| 18            | 1             | -5.202417               | -3.477324 | -0.888846 |
| 19            | 6             | -4.157285               | -1.618306 | -0.581840 |
| 20            | 1             | -4.935546               | -0.987037 | -0.998049 |
| 21            | 6             | -2.986163               | -1.045338 | -0.101826 |
| 22            | 6             | -2.573694               | 0.351640  | -0.081734 |
| 23            | 6             | -1.237893               | 0.416099  | 0.472522  |
| 24            | 6             | -1.273449               | 2.677288  | 0.247799  |
| 25            | 6             | -0.654152               | 3.941763  | 0.393676  |
| 26            | 1             | 0.341432                | 3.973724  | 0.825050  |
| 27            | 6             | -1.310979               | 5.087911  | -0.002842 |
| 28            | 1             | -0.830653               | 6.054783  | 0.113354  |
| 29            | 6             | -2.608798               | 5.015914  | -0.561710 |
| 30            | 1             | -3.110826               | 5.927823  | -0.870157 |
| 31            | 6             | -3.237253               | 3.797664  | -0.715246 |
| 32            | 1             | -4.232228               | 3.715142  | -1.140319 |
| 33            | 6             | -2.591767               | 2.604047  | -0.315021 |
| 34            | 7             | 0.210056                | -1.222841 | 1.657161  |
| 35            | 7             | -3.243315               | 1.406823  | -0.471892 |
| 36            | 7             | -0.593764               | 1.551095  | 0.637336  |
| 37            | 1             | 0.733728                | -0.268581 | -1.771758 |
| 38            | 1             | 2.613912                | -1.837218 | 0.085917  |
| 39            | 7             | 0.555183                | -2.308198 | -1.371355 |
| 40            | 8             | 0.918413                | -3.290870 | -0.682187 |
| 41            | 8             | -0.268727               | -2.398791 | -2.293286 |
| 42            | 6             | 3.145090                | 0.232661  | -0.351843 |
| 43            | 6             | 4.505369                | -0.004850 | -0.093147 |
| 44            | 6             | 2.751773                | 1.533440  | -0.712386 |
| 45            | 6             | 5.446565                | 1.018864  | -0.203978 |
| 46            | 1             | 4.829165                | -1.007385 | 0.174393  |
| 47            | 6             | 3.693173                | 2.553509  | -0.826272 |
| 48            | 1             | 1.702107                | 1.749634  | -0.884281 |
| 49            | 6             | 5.044418                | 2.302203  | -0.573153 |
| 50            | 1             | 6.493998                | 0.810069  | -0.006779 |
| 51            | 1             | 3.370108                | 3.550946  | -1.110230 |
| 52            | 1             | 5.774940                | 3.100712  | -0.661169 |
| 53            | 16            | 1.624730                | -2.290492 | 3.624579  |

Cartesian coordinates of **Ts exo-6a** at B3LYP/6-31G(d,p)

| Center Number | Atomic Number | Coordinates (Angstroms) |           |           |
|---------------|---------------|-------------------------|-----------|-----------|
|               |               | X                       | Y         | Z         |
| 1             | 6             | -1.507827               | 1.669304  | 2.218358  |
| 2             | 1             | -2.091048               | 2.194381  | 1.459891  |
| 3             | 1             | -0.876547               | 2.369980  | 2.764826  |
| 4             | 6             | -2.418870               | -0.799461 | 2.439982  |
| 5             | 1             | -3.355910               | -1.049798 | 1.935268  |
| 6             | 1             | -2.180946               | -1.594593 | 3.151831  |
| 7             | 6             | -1.292489               | -0.590156 | 1.459769  |
| 8             | 1             | -0.621630               | -1.420378 | 1.264334  |
| 9             | 6             | -1.917023               | -0.537844 | -0.537700 |
| 10            | 6             | -0.769837               | -0.110009 | -1.216907 |
| 11            | 6             | 0.491360                | 0.897002  | 0.947636  |
| 12            | 6             | 1.017645                | 2.213790  | 0.565477  |
| 13            | 6             | 0.423630                | 3.479657  | 0.460973  |
| 14            | 1             | -0.615638               | 3.645500  | 0.718775  |
| 15            | 6             | 1.186830                | 4.555492  | 0.001941  |
| 16            | 1             | 0.725787                | 5.535673  | -0.074907 |
| 17            | 6             | 2.527832                | 4.391654  | -0.366096 |
| 18            | 1             | 3.096366                | 5.244535  | -0.723523 |
| 19            | 6             | 3.131704                | 3.136154  | -0.280806 |
| 20            | 1             | 4.167117                | 2.983897  | -0.567386 |
| 21            | 6             | 2.381096                | 2.061795  | 0.183089  |
| 22            | 6             | 2.762287                | 0.666373  | 0.376254  |
| 23            | 6             | 1.603905                | -0.049946 | 0.851478  |
| 24            | 6             | 2.852494                | -1.929399 | 1.037754  |
| 25            | 6             | 2.981834                | -3.298770 | 1.371527  |
| 26            | 1             | 2.100118                | -3.817655 | 1.732548  |
| 27            | 6             | 4.193169                | -3.938905 | 1.223504  |
| 28            | 1             | 4.284219                | -4.990791 | 1.477129  |
| 29            | 6             | 5.323239                | -3.238063 | 0.737381  |
| 30            | 1             | 6.268981                | -3.759536 | 0.624871  |
| 31            | 6             | 5.229085                | -1.903533 | 0.405674  |
| 32            | 1             | 6.079509                | -1.343829 | 0.030292  |
| 33            | 6             | 3.999619                | -1.216678 | 0.547088  |
| 34            | 7             | -0.668918               | 0.625223  | 1.600623  |
| 35            | 7             | 3.940304                | 0.114643  | 0.227887  |
| 36            | 7             | 1.636828                | -1.318406 | 1.192369  |
| 37            | 1             | -2.049498               | -1.616748 | -0.538089 |
| 38            | 1             | -0.626696               | 0.848087  | -1.691022 |
| 39            | 7             | 0.224388                | -1.052908 | -1.575959 |
| 40            | 8             | 0.121481                | -2.223896 | -1.160532 |
| 41            | 8             | 1.173104                | -0.649946 | -2.271031 |
| 42            | 6             | -3.175037               | 0.245632  | -0.587366 |
| 43            | 6             | -4.400376               | -0.415989 | -0.392976 |
| 44            | 6             | -3.208709               | 1.628708  | -0.848339 |
| 45            | 6             | -5.610982               | 0.275197  | -0.440464 |
| 46            | 1             | -4.401989               | -1.490522 | -0.228664 |
| 47            | 6             | -4.417751               | 2.318905  | -0.896856 |
| 48            | 1             | -2.283910               | 2.169249  | -1.027612 |
| 49            | 6             | -5.625141               | 1.647250  | -0.688437 |
| 50            | 1             | -6.542897               | -0.262139 | -0.291564 |
| 51            | 1             | -4.418588               | 3.384839  | -1.105808 |
| 52            | 1             | -6.565757               | 2.187835  | -0.727657 |
| 53            | 16            | -2.611872               | 0.780508  | 3.377080  |

Cartesian coordinates of **TS endo-5a** at M06-2x/6-31G(d,p)

| Center Number | Atomic Number | Coordinates (Angstroms) |           |           |
|---------------|---------------|-------------------------|-----------|-----------|
|               |               | X                       | Y         | Z         |
| 1             | 6             | -2.644149               | -2.644298 | 0.994843  |
| 2             | 1             | -3.397917               | -1.860634 | 1.085517  |
| 3             | 1             | -2.302232               | -2.987767 | 1.971784  |
| 4             | 6             | -2.554542               | -3.356205 | -1.512088 |
| 5             | 1             | -3.326600               | -2.872646 | -2.124966 |
| 6             | 1             | -2.110713               | -4.165560 | -2.095100 |
| 7             | 6             | -1.512118               | -2.376048 | -1.076429 |
| 8             | 1             | -0.607916               | -2.195557 | -1.641397 |
| 9             | 6             | -1.980922               | -0.129751 | -1.587745 |
| 10            | 1             | -1.483622               | 0.001797  | -2.537759 |
| 11            | 6             | -1.612565               | 0.510562  | -0.401008 |
| 12            | 1             | -2.411815               | 0.608352  | 0.330382  |
| 13            | 6             | -0.567532               | 1.546942  | -0.328718 |
| 14            | 6             | -0.512454               | 2.362812  | 0.808343  |
| 15            | 1             | -1.273054               | 2.251250  | 1.577462  |
| 16            | 6             | 0.516605                | 3.283712  | 0.977614  |
| 17            | 1             | 0.544769                | 3.897981  | 1.871879  |
| 18            | 6             | 1.512476                | 3.401559  | 0.013960  |
| 19            | 6             | 1.459932                | 2.608317  | -1.132697 |
| 20            | 1             | 2.233976                | 2.692178  | -1.889470 |
| 21            | 6             | 0.428244                | 1.696131  | -1.306712 |
| 22            | 1             | 0.416035                | 1.070122  | -2.193889 |
| 23            | 6             | -0.699281               | -1.113691 | 0.735585  |
| 24            | 6             | -0.706860               | -0.634981 | 2.135651  |
| 25            | 6             | -1.737438               | -0.499967 | 3.071678  |
| 26            | 1             | -2.741204               | -0.856790 | 2.874194  |
| 27            | 6             | -1.472096               | 0.133794  | 4.283599  |
| 28            | 1             | -2.270727               | 0.232478  | 5.011813  |
| 29            | 6             | -0.208339               | 0.655648  | 4.575473  |
| 30            | 1             | -0.036325               | 1.148235  | 5.526557  |
| 31            | 6             | 0.817150                | 0.557689  | 3.642671  |
| 32            | 1             | 1.802249                | 0.975280  | 3.824640  |
| 33            | 6             | 0.557224                | -0.083588 | 2.438348  |
| 34            | 6             | 1.433366                | -0.262654 | 1.284950  |
| 35            | 6             | 0.684850                | -0.951815 | 0.261505  |
| 36            | 6             | 2.501654                | -0.890946 | -1.076647 |
| 37            | 6             | 3.132451                | -1.178027 | -2.308620 |
| 38            | 1             | 2.561546                | -1.718991 | -3.056318 |
| 39            | 6             | 4.425426                | -0.773340 | -2.535568 |
| 40            | 1             | 4.903265                | -0.994240 | -3.484404 |
| 41            | 6             | 5.141660                | -0.067306 | -1.541431 |
| 42            | 1             | 6.162463                | 0.244169  | -1.736845 |
| 43            | 6             | 4.552581                | 0.222786  | -0.335247 |
| 44            | 1             | 5.074599                | 0.762019  | 0.448057  |
| 45            | 6             | 3.222676                | -0.180007 | -0.074766 |
| 46            | 7             | -1.492830               | -2.125225 | 0.234127  |
| 47            | 7             | -3.332016               | -0.539311 | -1.758445 |
| 48            | 7             | 2.665183                | 0.128946  | 1.138372  |
| 49            | 7             | 1.195265                | -1.271654 | -0.895463 |
| 50            | 8             | -4.054309               | -0.682775 | -0.769317 |
| 51            | 8             | -3.703172               | -0.803537 | -2.899452 |
| 52            | 1             | 2.324133                | 4.108454  | 0.150633  |
| 53            | 16            | -3.262467               | -4.047558 | 0.024373  |



Cartesian coordinates of **TS exo-5a** at M06-2x/6-31G(d,p)

| Center Number | Atomic Number | Coordinates (Angstroms) |           |           |
|---------------|---------------|-------------------------|-----------|-----------|
|               |               | X                       | Y         | Z         |
| 1             | 6             | -2.035167               | -0.598716 | 2.478568  |
| 2             | 1             | -2.746912               | -0.182436 | 1.769624  |
| 3             | 1             | -1.984970               | 0.015668  | 3.381160  |
| 4             | 6             | -0.831195               | -2.928026 | 2.590575  |
| 5             | 1             | -0.846186               | -3.885242 | 2.063692  |
| 6             | 1             | -0.319533               | -3.057578 | 3.549497  |
| 7             | 6             | -0.168316               | -1.888222 | 1.748837  |
| 8             | 1             | 0.895179                | -1.946021 | 1.543140  |
| 9             | 6             | -0.698558               | -2.225257 | -0.322158 |
| 10            | 6             | -0.786405               | -0.994290 | -0.950209 |
| 11            | 6             | -0.237309               | 0.370312  | 1.085842  |
| 12            | 6             | -0.841104               | 1.692769  | 0.871369  |
| 13            | 6             | -2.101307               | 2.238998  | 1.140863  |
| 14            | 1             | -2.863183               | 1.710051  | 1.696662  |
| 15            | 6             | -2.404071               | 3.519937  | 0.683841  |
| 16            | 1             | -3.387467               | 3.928758  | 0.893694  |
| 17            | 6             | -1.483356               | 4.281151  | -0.037334 |
| 18            | 1             | -1.752439               | 5.274382  | -0.380591 |
| 19            | 6             | -0.221341               | 3.762527  | -0.306674 |
| 20            | 1             | 0.525807                | 4.324117  | -0.858574 |
| 21            | 6             | 0.084051                | 2.488328  | 0.148428  |
| 22            | 6             | 1.320971                | 1.732925  | -0.019453 |
| 23            | 6             | 1.139199                | 0.441967  | 0.603008  |
| 24            | 6             | 3.254983                | -0.104719 | 0.029012  |
| 25            | 6             | 4.316562                | -1.037075 | -0.007816 |
| 26            | 1             | 4.153989                | -2.004462 | 0.455278  |
| 27            | 6             | 5.495904                | -0.716390 | -0.634608 |
| 28            | 1             | 6.304809                | -1.438950 | -0.666686 |
| 29            | 6             | 5.665042                | 0.546317  | -1.249065 |
| 30            | 1             | 6.603628                | 0.781998  | -1.739627 |
| 31            | 6             | 4.646852                | 1.467894  | -1.233150 |
| 32            | 1             | 4.743199                | 2.442565  | -1.699871 |
| 33            | 6             | 3.420945                | 1.163712  | -0.599776 |
| 34            | 7             | -0.697199               | -0.654873 | 1.861272  |
| 35            | 7             | 2.420172                | 2.102255  | -0.608538 |
| 36            | 7             | 2.087538                | -0.457883 | 0.650631  |
| 37            | 1             | -1.556792               | -2.834459 | -0.065523 |
| 38            | 1             | 0.090243                | -0.667243 | -1.501346 |
| 39            | 7             | 0.455447                | -3.073650 | -0.587105 |
| 40            | 8             | 0.416576                | -4.196519 | -0.093931 |
| 41            | 8             | 1.391031                | -2.640662 | -1.233848 |
| 42            | 6             | -2.038929               | -0.282956 | -1.197253 |
| 43            | 6             | -2.011417               | 0.893436  | -1.963721 |
| 44            | 6             | -3.272118               | -0.700272 | -0.668653 |
| 45            | 6             | -3.167733               | 1.631408  | -2.184290 |
| 46            | 1             | -1.064681               | 1.230974  | -2.377483 |
| 47            | 6             | -4.427243               | 0.040256  | -0.891393 |
| 48            | 1             | -3.331631               | -1.609939 | -0.075074 |
| 49            | 6             | -4.382402               | 1.209434  | -1.649735 |
| 50            | 1             | -3.117823               | 2.542160  | -2.772625 |
| 51            | 1             | -5.370519               | -0.304153 | -0.478314 |
| 52            | 1             | -5.286944               | 1.782915  | -1.823689 |
| 53            | 16            | -2.533157               | -2.316764 | 2.827446  |

Cartesian coordinates of **TS endo-6a** at M06-2x/6-31G(d,p)

| Center Number | Atomic Number | Coordinates (Angstroms) |           |           |
|---------------|---------------|-------------------------|-----------|-----------|
|               |               | X                       | Y         | Z         |
| 1             | 6             | 0.410074                | -2.584419 | 2.322433  |
| 2             | 1             | 0.704003                | -3.292501 | 1.547037  |
| 3             | 1             | -0.530324               | -2.878314 | 2.789310  |
| 4             | 6             | 2.388699                | -0.918609 | 2.740525  |
| 5             | 1             | 3.339320                | -1.148836 | 2.247968  |
| 6             | 1             | 2.573872                | -0.141550 | 3.485334  |
| 7             | 6             | 1.352774                | -0.484138 | 1.746764  |
| 8             | 1             | 1.228980                | 0.562080  | 1.497693  |
| 9             | 6             | 2.086419                | -0.873495 | -0.284158 |
| 10            | 6             | 0.938409                | -0.961232 | -1.041547 |
| 11            | 6             | -0.789988               | -0.967874 | 0.885707  |
| 12            | 6             | -1.901908               | -1.846582 | 0.511987  |
| 13            | 6             | -2.050570               | -3.236730 | 0.526471  |
| 14            | 1             | -1.276069               | -3.894255 | 0.897464  |
| 15            | 6             | -3.216294               | -3.792976 | 0.002632  |
| 16            | 1             | -3.331909               | -4.871768 | 0.013423  |
| 17            | 6             | -4.223270               | -3.000855 | -0.549872 |
| 18            | 1             | -5.116162               | -3.467021 | -0.952447 |
| 19            | 6             | -4.071293               | -1.618430 | -0.608886 |
| 20            | 1             | -4.821955               | -0.977345 | -1.059442 |
| 21            | 6             | -2.916834               | -1.059561 | -0.085629 |
| 22            | 6             | -2.491744               | 0.336291  | -0.073528 |
| 23            | 6             | -1.174400               | 0.393642  | 0.523952  |
| 24            | 6             | -1.163079               | 2.635277  | 0.232820  |
| 25            | 6             | -0.514949               | 3.886290  | 0.351093  |
| 26            | 1             | 0.469396                | 3.903136  | 0.809453  |
| 27            | 6             | -1.129533               | 5.028365  | -0.102615 |
| 28            | 1             | -0.629641               | 5.986873  | -0.008030 |
| 29            | 6             | -2.413028               | 4.966742  | -0.692281 |
| 30            | 1             | -2.884181               | 5.878043  | -1.045300 |
| 31            | 6             | -3.062571               | 3.762612  | -0.820628 |
| 32            | 1             | -4.046640               | 3.682270  | -1.270241 |
| 33            | 6             | -2.455076               | 2.571407  | -0.363641 |
| 34            | 7             | 0.248620                | -1.252521 | 1.707430  |
| 35            | 7             | -3.127155               | 1.383926  | -0.510181 |
| 36            | 7             | -0.516852               | 1.512748  | 0.681330  |
| 37            | 1             | 0.525751                | -0.180395 | -1.664153 |
| 38            | 1             | 2.525836                | -1.826590 | 0.005656  |
| 39            | 7             | 0.349650                | -2.232380 | -1.306202 |
| 40            | 8             | 0.744370                | -3.220664 | -0.676653 |
| 41            | 8             | -0.545580               | -2.277869 | -2.137480 |
| 42            | 6             | 3.012522                | 0.276412  | -0.367514 |
| 43            | 6             | 4.375196                | 0.073996  | -0.121599 |
| 44            | 6             | 2.569122                | 1.572540  | -0.664823 |
| 45            | 6             | 5.275690                | 1.133934  | -0.181592 |
| 46            | 1             | 4.733011                | -0.929117 | 0.097187  |
| 47            | 6             | 3.469777                | 2.627806  | -0.729672 |
| 48            | 1             | 1.510217                | 1.756095  | -0.823482 |
| 49            | 6             | 4.826581                | 2.414366  | -0.487638 |
| 50            | 1             | 6.329643                | 0.955182  | 0.005713  |
| 51            | 1             | 3.108918                | 3.624150  | -0.965974 |
| 52            | 1             | 5.526697                | 3.241814  | -0.536390 |
| 53            | 16            | 1.699141                | -2.385700 | 3.587596  |

Cartesian coordinates of **TS exo-6a** at M06-2x/6-31G(d,p)

| Center Number | Atomic Number | Coordinates (Angstroms) |           |           |
|---------------|---------------|-------------------------|-----------|-----------|
|               |               | X                       | Y         | Z         |
| 1             | 6             | -1.637693               | 1.576419  | 2.185216  |
| 2             | 1             | -2.019723               | 2.238873  | 1.411826  |
| 3             | 1             | -1.056550               | 2.137899  | 2.919449  |
| 4             | 6             | -2.490873               | -0.928293 | 2.384650  |
| 5             | 1             | -3.305372               | -1.415983 | 1.840452  |
| 6             | 1             | -2.219218               | -1.550646 | 3.241421  |
| 7             | 6             | -1.313663               | -0.694255 | 1.492880  |
| 8             | 1             | -0.622008               | -1.507276 | 1.291658  |
| 9             | 6             | -1.859325               | -0.647648 | -0.571903 |
| 10            | 6             | -0.660024               | -0.276421 | -1.153942 |
| 11            | 6             | 0.378607                | 0.850807  | 0.950957  |
| 12            | 6             | 0.855025                | 2.181308  | 0.537821  |
| 13            | 6             | 0.235395                | 3.431287  | 0.421440  |
| 14            | 1             | -0.795458               | 3.595922  | 0.709770  |
| 15            | 6             | 0.963528                | 4.508585  | -0.079466 |
| 16            | 1             | 0.478952                | 5.476169  | -0.162761 |
| 17            | 6             | 2.294445                | 4.369862  | -0.477179 |
| 18            | 1             | 2.833200                | 5.227136  | -0.866479 |
| 19            | 6             | 2.925446                | 3.133925  | -0.373896 |
| 20            | 1             | 3.958054                | 2.989800  | -0.674841 |
| 21            | 6             | 2.207678                | 2.060845  | 0.131380  |
| 22            | 6             | 2.644075                | 0.684875  | 0.352460  |
| 23            | 6             | 1.525871                | -0.052360 | 0.885205  |
| 24            | 6             | 2.831583                | -1.880228 | 1.049103  |
| 25            | 6             | 3.004916                | -3.242699 | 1.383833  |
| 26            | 1             | 2.147682                | -3.775157 | 1.781687  |
| 27            | 6             | 4.217974                | -3.854230 | 1.187676  |
| 28            | 1             | 4.343556                | -4.902184 | 1.439764  |
| 29            | 6             | 5.309456                | -3.130724 | 0.651306  |
| 30            | 1             | 6.261185                | -3.629663 | 0.501195  |
| 31            | 6             | 5.168392                | -1.806878 | 0.317148  |
| 32            | 1             | 5.984626                | -1.226393 | -0.099728 |
| 33            | 6             | 3.929618                | -1.151193 | 0.505014  |
| 34            | 7             | -0.772900               | 0.542305  | 1.595176  |
| 35            | 7             | 3.825612                | 0.172253  | 0.170210  |
| 36            | 7             | 1.607786                | -1.303013 | 1.254167  |
| 37            | 1             | -2.060772               | -1.715083 | -0.529688 |
| 38            | 1             | -0.436587               | 0.644408  | -1.670682 |
| 39            | 7             | 0.335868                | -1.277036 | -1.354518 |
| 40            | 8             | 0.144309                | -2.400289 | -0.892317 |
| 41            | 8             | 1.363405                | -0.943122 | -1.934916 |
| 42            | 6             | -3.030635               | 0.247784  | -0.600236 |
| 43            | 6             | -4.313189               | -0.281169 | -0.409769 |
| 44            | 6             | -2.902129               | 1.629176  | -0.803135 |
| 45            | 6             | -5.431623               | 0.545098  | -0.393027 |
| 46            | 1             | -4.431804               | -1.355588 | -0.291561 |
| 47            | 6             | -4.019807               | 2.455395  | -0.783093 |
| 48            | 1             | -1.918104               | 2.063125  | -0.969002 |
| 49            | 6             | -5.288309               | 1.917792  | -0.571111 |
| 50            | 1             | -6.416682               | 0.114720  | -0.244552 |
| 51            | 1             | -3.901227               | 3.523179  | -0.940597 |
| 52            | 1             | -6.159295               | 2.564297  | -0.555916 |
| 53            | 16            | -3.045227               | 0.715652  | 2.957359  |

Cartesian coordinates of **TS endo-5a** at wB97xD/6-31G(d,p)

| Center Number | Atomic Number | Coordinates (Angstroms) |           |           |
|---------------|---------------|-------------------------|-----------|-----------|
|               |               | X                       | Y         | Z         |
| 1             | 6             | -2.592326               | -2.692043 | 0.967262  |
| 2             | 1             | -3.384526               | -1.945856 | 1.044512  |
| 3             | 1             | -2.242008               | -3.008737 | 1.949471  |
| 4             | 6             | -2.482000               | -3.386181 | -1.534187 |
| 5             | 1             | -3.276669               | -2.903744 | -2.122281 |
| 6             | 1             | -2.022785               | -4.162519 | -2.149073 |
| 7             | 6             | -1.479438               | -2.377793 | -1.093235 |
| 8             | 1             | -0.614727               | -2.099436 | -1.679038 |
| 9             | 6             | -2.077996               | -0.038326 | -1.557393 |
| 10            | 1             | -1.613214               | 0.081157  | -2.524214 |
| 11            | 6             | -1.642565               | 0.555894  | -0.372813 |
| 12            | 1             | -2.412068               | 0.647133  | 0.388599  |
| 13            | 6             | -0.594921               | 1.594288  | -0.324490 |
| 14            | 6             | -0.516672               | 2.412973  | 0.807726  |
| 15            | 1             | -1.251538               | 2.296817  | 1.599230  |
| 16            | 6             | 0.501085                | 3.350616  | 0.941417  |
| 17            | 1             | 0.547976                | 3.968236  | 1.832459  |
| 18            | 6             | 1.461589                | 3.483571  | -0.054605 |
| 19            | 6             | 1.387835                | 2.684103  | -1.193783 |
| 20            | 1             | 2.136569                | 2.776350  | -1.973884 |
| 21            | 6             | 0.368190                | 1.752720  | -1.330284 |
| 22            | 1             | 0.342458                | 1.119961  | -2.211173 |
| 23            | 6             | -0.699894               | -1.074538 | 0.706086  |
| 24            | 6             | -0.702249               | -0.628184 | 2.117382  |
| 25            | 6             | -1.738741               | -0.492952 | 3.042744  |
| 26            | 1             | -2.746991               | -0.822163 | 2.820985  |
| 27            | 6             | -1.475594               | 0.107577  | 4.271401  |
| 28            | 1             | -2.279173               | 0.205540  | 4.994212  |
| 29            | 6             | -0.205601               | 0.598050  | 4.584412  |
| 30            | 1             | -0.032430               | 1.068772  | 5.546295  |
| 31            | 6             | 0.826692                | 0.499511  | 3.659826  |
| 32            | 1             | 1.815615                | 0.895928  | 3.863331  |
| 33            | 6             | 0.569066                | -0.110401 | 2.440013  |
| 34            | 6             | 1.448950                | -0.289131 | 1.291073  |
| 35            | 6             | 0.690077                | -0.927146 | 0.248776  |
| 36            | 6             | 2.517823                | -0.899028 | -1.075468 |
| 37            | 6             | 3.147253                | -1.179290 | -2.308671 |
| 38            | 1             | 2.564988                | -1.680181 | -3.075013 |
| 39            | 6             | 4.455769                | -0.818078 | -2.515602 |
| 40            | 1             | 4.933219                | -1.032855 | -3.466014 |
| 41            | 6             | 5.187957                | -0.164276 | -1.499060 |
| 42            | 1             | 6.221754                | 0.112412  | -1.677650 |
| 43            | 6             | 4.599957                | 0.117501  | -0.291103 |
| 44            | 1             | 5.137507                | 0.617877  | 0.507072  |
| 45            | 6             | 3.254114                | -0.240488 | -0.051107 |
| 46            | 7             | -1.469310               | -2.113008 | 0.206266  |
| 47            | 7             | -3.411124               | -0.496220 | -1.656002 |
| 48            | 7             | 2.696868                | 0.057699  | 1.164123  |
| 49            | 7             | 1.199992                | -1.239631 | -0.910711 |
| 50            | 8             | -4.109841               | -0.585380 | -0.636590 |
| 51            | 8             | -3.816906               | -0.837336 | -2.772480 |
| 52            | 1             | 2.263834                | 4.206271  | 0.052578  |
| 53            | 16            | -3.131266               | -4.129687 | 0.002185  |

Cartesian coordinates of **TS exo-5a** at wB97xD/6-31G(d,p)

| Center Number | Atomic Number | Coordinates (Angstroms) |           |           |
|---------------|---------------|-------------------------|-----------|-----------|
|               |               | X                       | Y         | Z         |
| 1             | 6             | -2.170295               | 1.255426  | -1.846520 |
| 2             | 1             | -2.839880               | 0.689277  | -1.202869 |
| 3             | 1             | -2.232929               | 0.889129  | -2.874013 |
| 4             | 6             | -0.875694               | 3.502478  | -1.422468 |
| 5             | 1             | -0.821758               | 4.269340  | -0.646589 |
| 6             | 1             | -0.417775               | 3.894349  | -2.336300 |
| 7             | 6             | -0.198442               | 2.255248  | -0.963502 |
| 8             | 1             | 0.880594                | 2.224702  | -0.852220 |
| 9             | 6             | -0.527224               | 2.002670  | 1.170574  |
| 10            | 6             | -0.577841               | 0.645765  | 1.435866  |
| 11            | 6             | -0.284220               | -0.097621 | -0.989002 |
| 12            | 6             | -0.909502               | -1.421072 | -1.104147 |
| 13            | 6             | -2.212851               | -1.852103 | -1.367913 |
| 14            | 1             | -3.008799               | -1.169783 | -1.630427 |
| 15            | 6             | -2.514928               | -3.208672 | -1.288215 |
| 16            | 1             | -3.532198               | -3.529119 | -1.488515 |
| 17            | 6             | -1.549006               | -4.155767 | -0.950235 |
| 18            | 1             | -1.815082               | -5.205855 | -0.892270 |
| 19            | 6             | -0.245096               | -3.749352 | -0.690529 |
| 20            | 1             | 0.532536                | -4.458748 | -0.427887 |
| 21            | 6             | 0.059898                | -2.399514 | -0.772268 |
| 22            | 6             | 1.335529                | -1.732850 | -0.543131 |
| 23            | 6             | 1.131566                | -0.318044 | -0.723142 |
| 24            | 6             | 3.326936                | 0.028146  | -0.312746 |
| 25            | 6             | 4.425753                | 0.903436  | -0.161826 |
| 26            | 1             | 4.251818                | 1.964344  | -0.303038 |
| 27            | 6             | 5.661545                | 0.408085  | 0.172912  |
| 28            | 1             | 6.499884                | 1.086466  | 0.293560  |
| 29            | 6             | 5.851782                | -0.978179 | 0.369229  |
| 30            | 1             | 6.835515                | -1.352623 | 0.632782  |
| 31            | 6             | 4.799891                | -1.849978 | 0.231937  |
| 32            | 1             | 4.917252                | -2.918071 | 0.379694  |
| 33            | 6             | 3.516129                | -1.368370 | -0.109416 |
| 34            | 7             | -0.784502               | 1.114374  | -1.372094 |
| 35            | 7             | 2.484773                | -2.263401 | -0.241041 |
| 36            | 7             | 2.104779                | 0.552498  | -0.633303 |
| 37            | 1             | -1.399511               | 2.643859  | 1.183134  |
| 38            | 1             | 0.345463                | 0.182744  | 1.766680  |
| 39            | 7             | 0.651467                | 2.757140  | 1.564676  |
| 40            | 8             | 0.561949                | 3.980792  | 1.472351  |
| 41            | 8             | 1.656777                | 2.169405  | 1.931734  |
| 42            | 6             | -1.807636               | -0.121611 | 1.609053  |
| 43            | 6             | -1.715020               | -1.466569 | 1.997773  |
| 44            | 6             | -3.085801               | 0.413332  | 1.380014  |
| 45            | 6             | -2.851947               | -2.250608 | 2.143229  |
| 46            | 1             | -0.734766               | -1.900501 | 2.171009  |
| 47            | 6             | -4.221616               | -0.373196 | 1.526053  |
| 48            | 1             | -3.199655               | 1.453854  | 1.087424  |
| 49            | 6             | -4.111686               | -1.708505 | 1.908694  |
| 50            | 1             | -2.749800               | -3.291355 | 2.432612  |
| 51            | 1             | -5.199711               | 0.063611  | 1.349492  |
| 52            | 1             | -5.001530               | -2.318883 | 2.022420  |
| 53            | 16            | -2.609777               | 3.017623  | -1.707917 |

Cartesian coordinates of **TS endo-6a** at wB97xD/6-31G(d,p)

| Center Number | Atomic Number | Coordinates (Angstroms) |           |           |
|---------------|---------------|-------------------------|-----------|-----------|
|               |               | X                       | Y         | Z         |
| 1             | 6             | 0.416049                | -2.598857 | 2.299352  |
| 2             | 1             | 0.679677                | -3.299199 | 1.506603  |
| 3             | 1             | -0.508765               | -2.893984 | 2.794638  |
| 4             | 6             | 2.371729                | -0.900410 | 2.754466  |
| 5             | 1             | 3.346180                | -1.053889 | 2.280384  |
| 6             | 1             | 2.492810                | -0.139936 | 3.529992  |
| 7             | 6             | 1.342394                | -0.486586 | 1.749607  |
| 8             | 1             | 1.206028                | 0.558334  | 1.502081  |
| 9             | 6             | 2.101491                | -0.877103 | -0.299881 |
| 10            | 6             | 0.962034                | -0.991270 | -1.062542 |
| 11            | 6             | -0.796863               | -0.978197 | 0.883388  |
| 12            | 6             | -1.915662               | -1.850496 | 0.510891  |
| 13            | 6             | -2.081255               | -3.237110 | 0.535909  |
| 14            | 1             | -1.311796               | -3.901577 | 0.903302  |
| 15            | 6             | -3.257165               | -3.785304 | 0.028896  |
| 16            | 1             | -3.384305               | -4.862676 | 0.049861  |
| 17            | 6             | -4.260232               | -2.986319 | -0.518080 |
| 18            | 1             | -5.162543               | -3.444538 | -0.908581 |
| 19            | 6             | -4.092743               | -1.607039 | -0.586826 |
| 20            | 1             | -4.842696               | -0.962073 | -1.031914 |
| 21            | 6             | -2.927927               | -1.056800 | -0.078680 |
| 22            | 6             | -2.491628               | 0.333771  | -0.070699 |
| 23            | 6             | -1.177749               | 0.382300  | 0.525414  |
| 24            | 6             | -1.154036               | 2.626181  | 0.240321  |
| 25            | 6             | -0.500051               | 3.872877  | 0.362488  |
| 26            | 1             | 0.480577                | 3.887856  | 0.827417  |
| 27            | 6             | -1.103269               | 5.017209  | -0.099609 |
| 28            | 1             | -0.598321               | 5.972819  | -0.002775 |
| 29            | 6             | -2.380352               | 4.961531  | -0.700854 |
| 30            | 1             | -2.842420               | 5.873882  | -1.063080 |
| 31            | 6             | -3.036326               | 3.761665  | -0.830489 |
| 32            | 1             | -4.016099               | 3.689722  | -1.290097 |
| 33            | 6             | -2.440802               | 2.568806  | -0.364193 |
| 34            | 7             | 0.243955                | -1.262306 | 1.703896  |
| 35            | 7             | -3.119277               | 1.385298  | -0.510101 |
| 36            | 7             | -0.517185               | 1.499407  | 0.689635  |
| 37            | 1             | 0.534925                | -0.214280 | -1.678668 |
| 38            | 1             | 2.553624                | -1.820158 | -0.001842 |
| 39            | 7             | 0.408055                | -2.272609 | -1.345090 |
| 40            | 8             | 0.824252                | -3.264132 | -0.729177 |
| 41            | 8             | -0.474098               | -2.329450 | -2.195184 |
| 42            | 6             | 3.011246                | 0.285938  | -0.375809 |
| 43            | 6             | 4.374332                | 0.095884  | -0.125243 |
| 44            | 6             | 2.558689                | 1.578428  | -0.671177 |
| 45            | 6             | 5.264948                | 1.163882  | -0.176459 |
| 46            | 1             | 4.742446                | -0.903470 | 0.092081  |
| 47            | 6             | 3.448462                | 2.642777  | -0.724475 |
| 48            | 1             | 1.500560                | 1.755153  | -0.832339 |
| 49            | 6             | 4.805129                | 2.441362  | -0.476959 |
| 50            | 1             | 6.319792                | 0.994175  | 0.014100  |
| 51            | 1             | 3.077612                | 3.636707  | -0.954902 |
| 52            | 1             | 5.498254                | 3.275329  | -0.516369 |
| 53            | 16            | 1.750000                | -2.437259 | 3.522751  |

Cartesian coordinates of **TS exo-6a** at wB97xD/6-31G(d,p)

| Center Number | Atomic Number | Coordinates (Angstroms) |           |           |
|---------------|---------------|-------------------------|-----------|-----------|
|               |               | X                       | Y         | Z         |
| 1             | 6             | -1.604038               | 1.561495  | 2.201772  |
| 2             | 1             | -2.152336               | 2.093037  | 1.424464  |
| 3             | 1             | -0.990250               | 2.251817  | 2.780653  |
| 4             | 6             | -2.474633               | -0.909839 | 2.413608  |
| 5             | 1             | -3.369435               | -1.193717 | 1.851626  |
| 6             | 1             | -2.259793               | -1.688436 | 3.149153  |
| 7             | 6             | -1.306602               | -0.691852 | 1.501125  |
| 8             | 1             | -0.633252               | -1.512357 | 1.278098  |
| 9             | 6             | -1.868201               | -0.600021 | -0.606830 |
| 10            | 6             | -0.675843               | -0.208390 | -1.184095 |
| 11            | 6             | 0.403375                | 0.829936  | 0.945050  |
| 12            | 6             | 0.881001                | 2.157176  | 0.537484  |
| 13            | 6             | 0.240555                | 3.390853  | 0.394638  |
| 14            | 1             | -0.803354               | 3.527958  | 0.650573  |
| 15            | 6             | 0.960979                | 4.475457  | -0.100336 |
| 16            | 1             | 0.463912                | 5.434263  | -0.207585 |
| 17            | 6             | 2.301853                | 4.351235  | -0.467011 |
| 18            | 1             | 2.835906                | 5.212013  | -0.854968 |
| 19            | 6             | 2.949124                | 3.125920  | -0.342509 |
| 20            | 1             | 3.988229                | 2.998393  | -0.626307 |
| 21            | 6             | 2.239088                | 2.045514  | 0.157057  |
| 22            | 6             | 2.672712                | 0.669659  | 0.381585  |
| 23            | 6             | 1.545967                | -0.073494 | 0.879069  |
| 24            | 6             | 2.846887                | -1.904130 | 1.057018  |
| 25            | 6             | 3.014919                | -3.268774 | 1.383646  |
| 26            | 1             | 2.151561                | -3.809037 | 1.755944  |
| 27            | 6             | 4.233610                | -3.875583 | 1.212729  |
| 28            | 1             | 4.355282                | -4.925794 | 1.457402  |
| 29            | 6             | 5.335780                | -3.145921 | 0.711005  |
| 30            | 1             | 6.291875                | -3.641884 | 0.579600  |
| 31            | 6             | 5.200570                | -1.819533 | 0.386501  |
| 32            | 1             | 6.027621                | -1.236372 | -0.003651 |
| 33            | 6             | 3.956648                | -1.168533 | 0.549751  |
| 34            | 7             | -0.741243               | 0.532569  | 1.603566  |
| 35            | 7             | 3.858132                | 0.157341  | 0.222504  |
| 36            | 7             | 1.617311                | -1.330205 | 1.230902  |
| 37            | 1             | -2.055486               | -1.669315 | -0.580459 |
| 38            | 1             | -0.465944               | 0.736245  | -1.660627 |
| 39            | 7             | 0.313555                | -1.193102 | -1.465718 |
| 40            | 8             | 0.145175                | -2.341108 | -1.049651 |
| 41            | 8             | 1.311539                | -0.827951 | -2.085073 |
| 42            | 6             | -3.054211               | 0.277569  | -0.617326 |
| 43            | 6             | -4.321695               | -0.272450 | -0.392636 |
| 44            | 6             | -2.962544               | 1.659361  | -0.840202 |
| 45            | 6             | -5.457447               | 0.530302  | -0.364411 |
| 46            | 1             | -4.419092               | -1.346384 | -0.257025 |
| 47            | 6             | -4.096602               | 2.461080  | -0.813057 |
| 48            | 1             | -1.995622               | 2.116622  | -1.030204 |
| 49            | 6             | -5.348858               | 1.901421  | -0.568175 |
| 50            | 1             | -6.429015               | 0.080297  | -0.188438 |
| 51            | 1             | -4.002125               | 3.528250  | -0.987901 |
| 52            | 1             | -6.233067               | 2.529672  | -0.545521 |
| 53            | 16            | -2.754438               | 0.670093  | 3.289101  |

## Experimental section

**General procedure for preparation of spiropyrrothiazole 5(a–n):** A mixture of ninhydrin **1** (0.178 g, 1 mmol), 1,2-phenylenediamine **2** (0.108 g, 1 mmol), thiazolidin-4-carboxylic acid **3** (0.133 g, 1 mmol) and trans- $\beta$ -nitrostyrene **4a** (0.149 g, 1 mmol) was heated under reflux for about 5 h (the progress of the reaction was monitored by TLC). After completion, the reaction mixture was filtered and the precipitated solid was washed with 3 mL cold ethanol (70%) to afford pure product **5a-n**.

## Spectroscopic data of synthesized compounds

### 7'-nitro-6'-(phenyl)-3',6',7',7a'-tetrahydro-1'H-spiro[indeno[1,2-b]quinoxaline-11,5'-pyrrolo[1,2-c]thiazole]

#### (5a)

Gray solid (0.38 g, 85%); **mp**: 236-238°C. **IR** (KBr) ( $\nu_{\max}/\text{cm}^{-1}$ ): 1548, 1373. **<sup>1</sup>H NMR** (400MHz, CDCl<sub>3</sub>),  $\delta_{\text{H}}$ : 8.16-8.21 (m, 2H, ArH), 8.05 (d, 1H,  $J=7.6$  Hz, ArH), 7.69-8.00 (m, 4H, ArH), 7.65 (td, 1H,  $J=7.6, 0.8$  Hz, ArH), 6.89 (dd, 1H,  $J=11.2, 7.2$  Hz, H<sub>b</sub>), 6.85 (d, 1H,  $J=7.2$  Hz, ArH), 6.79 (t, 2H,  $J=7.2$  Hz, ArH), 6.69 (d, 2H,  $J=7.2$  Hz, ArH), 4.88 (q, 1H,  $J=7.2$  Hz, H<sub>c</sub>), 4.75 (d, 1H,  $J=11.2$  Hz, H<sub>a</sub>), 4.05 (1/2ABq, 1H,  $J=9.6$  Hz, N-CH<sub>f</sub>), 3.91 (1/2ABq, 1H,  $J=9.6$  Hz, N-CH<sub>g</sub>), 3.23 (ABq d, 1H,  $J=10.4$  Hz, H<sub>d</sub>), 3.09 (ABq d, 1H,  $J=10.4$  Hz, H<sub>e</sub>) ppm. **<sup>13</sup>C NMR** (100MHz, CDCl<sub>3</sub>),  $\delta_{\text{C}}$ : 161.8, 152.3, 143.0, 142.3, 141.2, 138.5, 132.1, 131.6, 130.9, 129.9, 129.5, 129.2, 129.1, 128.0, 127.8, 126.1, 122.5, 85.7, 75.3 (spiro carbon), 68.2, 56.5, 54.3, 33.5 ppm. **MS**:  $m/z = 453$  [ $\text{M}^+ + 1$ ]; Anal. Calcd. For C<sub>26</sub>H<sub>20</sub>N<sub>4</sub>O<sub>2</sub>S: C, 69.01; H, 4.45; N, 12.38. Found: C, 69.12; H, 4.37; N, 12.45.

### 7'-nitro-6'-(p-tolyl)-3',6',7',7a'-tetrahydro-1'H-spiro[indeno[1,2-b]quinoxaline-11,5'-pyrrolo[1,2-c]thiazole]

#### (5b)

Gray solid (0.33 g, 70%); **mp**: 223-225°C. **IR** (KBr) ( $\nu_{\max}/\text{cm}^{-1}$ ): 1547, 1371. **<sup>1</sup>H NMR** (400MHz, CDCl<sub>3</sub>),  $\delta_{\text{H}}$ : 7.70-8.20 (m, 7H, ArH), 7.64 (td, 1H,  $J=7.2, 1.2$  Hz, ArH), 6.86 (dd, 1H,  $J=11.2, 7.2$  Hz, H<sub>b</sub>), 6.56-6.61 (m, 4H, ArH), 4.87 (q, 1H,  $J=7.2$  Hz, H<sub>c</sub>), 4.71 (d, 1H,  $J=11.6$  Hz, H<sub>a</sub>), 4.04 (1/2ABq, 1H,  $J=9.6$  Hz, N-CH<sub>f</sub>), 3.91 (1/2ABq, 1H,  $J=9.6$  Hz, N-CH<sub>g</sub>), 3.22 (ABq d, 1H,  $J=10.4$  Hz, H<sub>d</sub>), 3.08 (ABq d, 1H,  $J=10.4$  Hz, H<sub>e</sub>), 1.99 (s, 3H, Ar-CH<sub>3</sub>) ppm. **<sup>13</sup>C NMR** (100MHz, CDCl<sub>3</sub>),  $\delta_{\text{C}}$ : 162.0, 143.1, 142.3, 141.3, 138.5, 137.5, 132.1, 130.8, 129.9, 129.5, 129.2, 129.0, 128.7, 128.5, 127.7, 126.1, 122.4, 85.9, 75.2 (spiro carbon), 68.1, 56.3, 54.3, 33.4, 20.8 ppm. **MS**:  $m/z = 466$  [ $\text{M}^+$ ]; Anal. Calcd. For C<sub>27</sub>H<sub>22</sub>N<sub>4</sub>O<sub>2</sub>S: C, 69.51; H, 4.75; N, 12.01. Found: C, 69.63; H, 4.84; N, 11.91.

### 6'-(4-methoxyphenyl)-7'-nitro-3',6',7',7a'-tetrahydro-1'H-spiro[indeno[1,2-b]quinoxaline-11,5'-pyrrolo[1,2-c]thiazole] (5c)

Cream solid (0.42g, 87%); **mp**: 231-233°C. **IR** (KBr) ( $\nu_{\max}/\text{cm}^{-1}$ ): 1543, 1374, 1253, 1029. **<sup>1</sup>H NMR** (400MHz, CDCl<sub>3</sub>),  $\delta_{\text{H}}$ : 7.71-8.19 (m, 7H, ArH), 7.64 (td, 1H,  $J=7.6, 0.8$  Hz, ArH), 6.82 (dd, 1H,  $J=11.2, 7.2$  Hz, H<sub>b</sub>), 6.62 (d, 2H,  $J=8.8$  Hz, ArH), 6.32 (d, 2H,  $J=8.8$  Hz, ArH), 4.86 (q, 1H,  $J=7.2$  Hz, H<sub>c</sub>), 4.69 (d, 1H,  $J=11.2$  Hz, H<sub>a</sub>), 4.04 (1/2ABq, 1H,  $J=9.6$  Hz, N-CH<sub>f</sub>), 3.91 (1/2ABq, 1H,  $J=9.6$  Hz, N-CH<sub>g</sub>), 3.51 (s, 3H, Ar-OCH<sub>3</sub>), 3.21 (ABq d, 1H,



$J=10.4$  Hz,  $H_d$ ), 3.09 (ABq d, 1H,  $J=10.4$  Hz,  $H_e$ ), ppm.  $^{13}\text{C NMR}$  (100MHz,  $\text{CDCl}_3$ ),  $\delta_{\text{C}}$ : 162.0, 158.8, 152.4, 143.2, 142.4, 141.3, 138.5, 132.1, 130.8, 129.9, 129.5, 129.2, 129.1, 129.0, 126.1, 123.5, 122.4, 113.4, 86.1, 75.3 (spiro carbon), 68.1, 56.1, 54.9, 54.2, 33.4 ppm. **MS**:  $m/z = 483$  [ $\text{M}^+ + 1$ ]; Anal. Calcd. For  $\text{C}_{27}\text{H}_{22}\text{N}_4\text{O}_3\text{S}$ : C, 67.20; H, 4.60; N, 11.61. Found: C, 67.32; H, 4.54; N, 11.65.

**4-(7'-nitro-3',6',7',7a'-tetrahydro-1'H-spiro[indeno[1,2-b]quinoxaline-11,5'-pyrrolo[1,2-c]thiazol]-6'-yl)benzotrile (5d)**

Gray solid (0.35g, 75%); **mp**: 246-248°C. **IR** (KBr) ( $\nu_{\text{max}}/\text{cm}^{-1}$ ): 2227, 1546, 1373.  $^1\text{H NMR}$  (400MHz,  $\text{CDCl}_3$ ),  $\delta_{\text{H}}$ : 8.21 (d, 1H,  $J=7.6$  Hz, ArH), 8.14-8.16 (m, 1H, ArH), 8.07 (d, 1H,  $J=7.6$  Hz, ArH), 7.73-8.03 (m, 5H, ArH), 7.11 (d, 2H,  $J=8.4$  Hz, ArH), 6.92 (dd, 1H,  $J=11.2, 7.6$  Hz,  $H_b$ ), 6.83 (d, 2H,  $J=8.4$  Hz, ArH), 4.88 (q, 1H,  $J=7.6$  Hz,  $H_c$ ), 4.76 (d, 1H,  $J=11.2$  Hz,  $H_a$ ), 4.04 (1/2ABq, 1H,  $J=9.6$  Hz, N- $\text{CH}_f$ ), 3.91 (1/2ABq, 1H,  $J=9.6$  Hz, N- $\text{CH}_g$ ), 3.25 (ABq d, 1H,  $J=10.8$  Hz,  $H_d$ ), 3.04 (ABq d, 1H,  $J=10.8$  Hz,  $H_e$ ) ppm.  $^{13}\text{C NMR}$  (100MHz,  $\text{CDCl}_3$ ),  $\delta_{\text{C}}$ : 161.1, 152.0, 142.4, 142.1, 141.1, 138.5, 137.4, 132.3, 131.7, 131.3, 130.3, 129.6, 129.3, 128.5, 126.1, 122.7, 117.9, 111.9, 85.3, 75.2 (spiro carbon), 68.0, 56.1, 54.5, 33.6 ppm. **MS**:  $m/z = 477$  [ $\text{M}^+$ ]; Anal. Calcd. For  $\text{C}_{27}\text{H}_{19}\text{N}_5\text{O}_2\text{S}$ : C, 67.91; H, 4.01; N, 14.67. Found: C, 68.02; H, 4.10; N, 14.60.

**7'-nitro-6'-(2-nitrophenyl)-3',6',7',7a'-tetrahydro-1'H-spiro[indeno[1,2-b]quinoxaline-11,5'-pyrrolo[1,2-c]thiazole] (5e)**

Gray solid (0.44g, 88%); **mp**: 230-232°C. **IR** (KBr) ( $\nu_{\text{max}}/\text{cm}^{-1}$ ): 1551, 1370.  $^1\text{H NMR}$  (400MHz,  $\text{CDCl}_3$ ),  $\delta_{\text{H}}$ : 8.19 (d, 1H,  $J=8.4$  Hz, ArH), 7.63-8.05 (m, 7H, ArH), 7.39 (d, 1H,  $J=7.2$  Hz, ArH), 7.31 (d, 1H,  $J=7.6$  Hz, ArH), 6.96-7.03 (m, 2H, ArH), 6.86 (dd, 1H,  $J=10.8, 7.2$  Hz,  $H_b$ ), 5.94 (d, 1H,  $J=10.8$  Hz,  $H_a$ ), 4.92 (q, 1H,  $J=7.2$  Hz,  $H_c$ ), 4.00 (1/2ABq, 1H,  $J=9.6$  Hz, N- $\text{CH}_f$ ), 3.84 (1/2ABq, 1H,  $J=9.6$  Hz, N- $\text{CH}_g$ ), 3.28 (ABq d, 1H,  $J=10.4$  Hz,  $H_d$ ), 3.12 (t, 1H,  $J=10$  Hz,  $H_e$ ) ppm.  $^{13}\text{C NMR}$  (100MHz,  $\text{CDCl}_3$ ),  $\delta_{\text{C}}$ : 161.2, 153.8, 150.3, 143.5, 142.4, 140.9, 140.8, 137.8, 132.7, 131.2, 130.2, 130.1, 129.4, 129.3, 129.2, 128.7, 127.0, 125.8, 124.8, 122.4, 85.9, 75.3 (spiro carbon), 68.1, 53.6, 48.8, 33.4 ppm. **MS**:  $m/z = 451$  [ $\text{M}^+ - \text{NO}_2$ ]; Anal. Calcd. For  $\text{C}_{26}\text{H}_{19}\text{N}_5\text{O}_4\text{S}$ : C, 62.77; H, 3.85; N, 14.08. Found: C, 62.90; H, 3.93; N, 14.00.

**6'-(4-bromophenyl)-7'-nitro-3',6',7',7a'-tetrahydro-1'H-spiro[indeno[1,2-b]quinoxaline-11,5'-pyrrolo[1,2-c]thiazole] (5f)**

Gray solid (0.44g, 83%); **mp**: 256-257°C. **IR** (KBr) ( $\nu_{\text{max}}/\text{cm}^{-1}$ ): 1544, 1374, 1071.  $^1\text{H NMR}$  (400MHz,  $\text{CDCl}_3$ ),  $\delta_{\text{H}}$ : 8.19 (d, 1H,  $J=8$  Hz, ArH), 7.64-8.17 (m, 7H, ArH), 6.94 (d, 2H,  $J=8.8$  Hz, ArH), 6.85 (dd, 1H,  $J=11.2, 7.6$  Hz,  $H_b$ ), 6.59 (d, 2H,  $J=8.4$  Hz, ArH), 4.87 (q, 1H,  $J=7.6$  Hz,  $H_c$ ), 4.69 (d, 1H,  $J=11.2$  Hz,  $H_a$ ), 4.02 (1/2ABq, 1H,  $J=9.6$  Hz, N- $\text{CH}_f$ ), 3.91 (1/2ABq, 1H,  $J=9.6$  Hz, N- $\text{CH}_g$ ), 3.23 (ABq d, 1H,  $J=10.8$  Hz,  $H_d$ ), 3.06 (ABq d, 1H,  $J=10.8$  Hz,  $H_e$ ) ppm.  $^{13}\text{C NMR}$  (100MHz,  $\text{CDCl}_3$ ),  $\delta_{\text{C}}$ : 161.5, 152.2, 142.6, 142.4, 141.2, 138.5, 132.2, 131.2, 131.0, 130.9, 130.1,

129.5, 129.42, 129.41, 129.2, 126.1, 122.6, 122.0, 85.7, 75.1 (spiro carbon), 68.0, 56.0, 54.4, 33.5 ppm. **MS**:  $m/z = 532 [M^+ + 1]$ ; Anal. Calcd. For  $C_{26}H_{19}BrN_4O_2S$ : C, 58.76; H, 3.60; N, 10.54. Found: C, 58.87; H, 3.52; N, 10.61.

**6'-(4-chlorophenyl)-7'-nitro-3',6',7',7a'-tetrahydro-1'H-spiro[indeno[1,2-b]quinoxaline-11,5'-pyrrolo[1,2-c]thiazole] (5g)**

Gray solid (0.45g, 93%); **mp**: 246-248°C. **IR** (KBr) ( $\nu_{max}/cm^{-1}$ ): 1542, 1374, 1098. **<sup>1</sup>H NMR** (400MHz,  $CDCl_3$ ),  $\delta_H$ : 8.19 (d, 1H,  $J=8$  Hz, ArH), 7.73-8.17 (m, 6H, ArH), 7.65 (td, 1H,  $J=7.6, 0.8$  Hz, ArH), 6.85 (dd, 1H,  $J=11.2, 7.2$  Hz,  $H_b$ ), 6.79 (d, 2H,  $J=8.4$  Hz, ArH), 6.65 (d, 2H,  $J=8.4$  Hz, ArH), 4.87 (q, 1H,  $J=7.2$  Hz,  $H_c$ ), 4.71 (d, 1H,  $J=11.2$  Hz,  $H_a$ ), 4.03 (1/2ABq, 1H,  $J=9.6$  Hz, N- $CH_f$ ), 3.91 (1/2ABq, 1H,  $J=9.6$  Hz, N- $CH_g$ ), 3.23 (ABq d, 1H,  $J=10.4$  Hz,  $H_d$ ), 3.06 (ABq d, 1H,  $J=10.4$  Hz,  $H_e$ ) ppm. **<sup>13</sup>C NMR** (100MHz,  $CDCl_3$ ),  $\delta_C$ : 161.5, 152.2, 142.6, 142.4, 141.2, 138.6, 133.8, 132.2, 131.0, 130.4, 130.1, 129.4, 129.2, 129.2, 128.2, 126.1, 122.6, 85.8, 75.1 (spiro carbon), 68.0, 55.9, 54.3, 33.5 ppm. **MS**:  $m/z = 486 [M^+]$ ; Anal. Calcd. For  $C_{26}H_{19}ClN_4O_2S$ : C, 64.13; H, 3.93; N, 11.51. Found: C, 64.26; H, 4.03; N, 11.41.

**6'-(2-methoxyphenyl)-7'-nitro-3',6',7',7a'-tetrahydro-1'H-spiro[indeno[1,2-b]quinoxaline-11,5'-pyrrolo[1,2-c]thiazole] (5h)**

Cream solid (0.41g, 85%); **mp**: 234-236°C. **IR** (KBr) ( $\nu_{max}/cm^{-1}$ ): 1550, 1369, 1251, 1022. **<sup>1</sup>H NMR** (400MHz,  $CDCl_3$ ),  $\delta_H$ : 8.18 (d, 1H,  $J=7.6$  Hz, ArH), 8.15-8.16 (m, 1H, ArH), 8.02 (d, 1H,  $J=7.6$  Hz, ArH), 7.67-7.99 (m, 4H, ArH), 7.58 (t, 1H,  $J=7.2$  Hz, ArH), 6.97 (dd, 1H,  $J=7.6, 1.2$  Hz, ArH), 6.83 (dd, 1H,  $J=11.6, 7.2$  Hz,  $H_b$ ), 6.79 (dd, 1H,  $J=7.6, 1.2$  Hz, ArH), 6.35-6.40 (m, 2H, ArH), 5.39 (d, 1H,  $J=11.2$  Hz,  $H_a$ ), 4.87 (q, 1H,  $J=6.8$  Hz,  $H_c$ ), 4.03 (1/2ABq, 1H,  $J=9.2$  Hz, N- $CH_f$ ), 3.86 (1/2ABq, 1H,  $J=8.8$  Hz, N- $CH_g$ ), 3.22 (ABq d, 1H,  $J=10.4$  Hz,  $H_d$ ), 3.19 (s, 3H, Ar- $OCH_3$ ), 3.11 (t, 1H,  $J=10$  Hz,  $H_e$ ) ppm. **<sup>13</sup>C NMR** (100MHz,  $CDCl_3$ ),  $\delta_C$ : 162.3, 157.3, 152.5, 143.9, 142.2, 141.1, 137.9, 131.3, 130.2, 129.7, 129.5, 129.0, 128.99, 128.97, 128.7, 126.9, 121.8, 120.3, 119.7, 110.4, 86.0, 74.8 (spiro carbon), 68.5, 54.7, 53.6, 49.2, 33.2 ppm. **MS**:  $m/z = 483 [M^+ + 1]$ ; Anal. Calcd. For  $C_{27}H_{22}N_4O_3S$ : C, 67.20; H, 4.60; N, 11.61. Found: C, 67.26; H, 4.67; N, 11.51.

**6'-(4-fluorophenyl)-7'-nitro-3',6',7',7a'-tetrahydro-1'H-spiro[indeno[1,2-b]quinoxaline-11,5'-pyrrolo[1,2-c]thiazole] (5i)**

Cream solid (0.38g, 82%); **mp**: 240-242°C. **IR** (KBr) ( $\nu_{max}/cm^{-1}$ ): 1549, 1374, 1231. **<sup>1</sup>H NMR** (400MHz,  $CDCl_3$ ),  $\delta_H$ : 8.16-8.18 (m, 2H, ArH), 8.07 (d, 1H,  $J=7.6$  Hz, ArH), 7.64-8.02 (m, 5H, ArH), 6.84 (dd, 1H,  $J=11.2, 7.2$  Hz,  $H_b$ ), 6.68 (dd, 2H,  $J=8.8, 5.2$  Hz, ArH), 6.50 (t, 2H,  $J=8.8$  Hz, ArH), 4.87 (q, 1H,  $J=7.2$  Hz,  $H_c$ ), 4.72 (d, 1H,  $J=11.2$  Hz,  $H_a$ ), 4.04 (1/2ABq, 1H,  $J=9.6$  Hz, N- $CH_f$ ), 3.91 (1/2ABq, 1H,  $J=9.6$  Hz, N- $CH_g$ ), 3.22 (ABq d, 1H,  $J=10.8$  Hz,  $H_d$ ), 3.08 (ABq d, 1H,  $J=10.4$  Hz,  $H_e$ ) ppm. **<sup>13</sup>C NMR** (100MHz,  $CDCl_3$ ),  $\delta_C$ : 163.2, 161.7, 160.8, 152.2, 142.8, 142.4, 141.2, 138.5, 132.2, 131.0, 130.1, 129.5, 129.45, 129.40, 129.3, 129.2, 127.6, 127.5, 126.1, 122.6, 115.1, 114.9, 85.9, 75.2 (spiro carbon), 68.1, 55.9, 54.3, 33.5 ppm. **MS**:  $m/z = 471 [M^+ + 1]$ ; Anal. Calcd. For  $C_{26}H_{19}FN_4O_2S$ : C, 66.37; H, 4.07; N, 11.91. Found: C, 66.47; H, 4.18; N, 11.83.

**6'-(3-bromophenyl)-7'-nitro-3',6',7',7a'-tetrahydro-1'H-spiro[indeno[1,2-b]quinoxaline-11,5'-pyrrolo[1,2-c]thiazole] (5j)**

Cream solid (0.39g, 74%); **mp**: 237-238°C. **IR** (KBr) ( $\nu_{\max}/\text{cm}^{-1}$ ): 1545, 1371, 1072. **<sup>1</sup>H NMR** (400MHz, CDCl<sub>3</sub>),  $\delta_{\text{H}}$ : 8.17 -8.21 (m, 2H, ArH), 8.07 (d, 1H,  $J=7.6$  Hz, ArH), 7.72 -8.02 (m, 4H, ArH), 7.66 (td, 1H,  $J=7.6, 1.2$  Hz, ArH), 6.97-7.00 (m, 1H, ArH), 6.89 (t, 1H,  $J=1.6$  Hz, ArH), 6.82 (dd, 1H,  $J=11.2, 7.2$  Hz, H<sub>b</sub>), 6.60 -6.68 (m, 2H, ArH), 4.88 (q, 1H,  $J=7.2$  Hz, H<sub>c</sub>), 4.69 (d, 1H,  $J=11.2$  Hz, H<sub>a</sub>), 4.03 (1/2ABq, 1H,  $J=9.6$  Hz, N-CH<sub>f</sub>), 3.91 (1/2ABq, 1H,  $J=9.6$  Hz, N-CH<sub>g</sub>), 3.23 (ABq d, 1H,  $J=10.8$  Hz, H<sub>d</sub>), 3.04 (ABq d, 1H,  $J=10.8$  Hz, H<sub>e</sub>) ppm. **<sup>13</sup>C NMR** (100MHz, CDCl<sub>3</sub>),  $\delta_{\text{C}}$ : 161.4, 152.2, 142.5, 142.4, 141.2, 138.5, 134.1, 132.3, 131.2, 131.1, 130.9, 130.1, 129.4, 129.1, 126.5, 126.0, 122.6, 122.0, 85.6, 75.2 (spiro carbon), 68.1, 56.2, 54.2, 33.5 ppm. **MS**:  $m/z = 531$  [M<sup>+</sup>]; Anal. Calcd. For C<sub>26</sub>H<sub>19</sub>BrN<sub>4</sub>O<sub>2</sub>S: C, 58.76; H, 3.60; N, 10.54. Found: C, 58.89; H, 3.70; N, 10.46.

**6'-(furan-2-yl)-7'-nitro-3',6',7',7a'-tetrahydro-1'H-spiro[indeno[1,2-b]quinoxaline-11,5'-pyrrolo[1,2-c]thiazole] (5k)**

Gray solid (0.35g, 80%); **mp**: 221-222°C. **IR** (KBr) ( $\nu_{\max}/\text{cm}^{-1}$ ): 1553, 1372. **<sup>1</sup>H NMR** (400MHz, CDCl<sub>3</sub>),  $\delta_{\text{H}}$ : 7.70 - 8.16 (m, 7H, ArH), 7.66 (td, 1H,  $J=7.6, 1.2$  Hz, ArH), 6.80 (t, 1H,  $J=1.2$  Hz, furan), 6.70 (dd, 1H,  $J=10.4, 7.6$  Hz, H<sub>b</sub>), 5.81 (dd, 1H,  $J=3.2, 1.6$  Hz, furan), 5.54 (d, 1H,  $J=3.6$  Hz, furan), 4.91 (d, 1H,  $J=10.8$  Hz, H<sub>a</sub>), 4.89 (q, 1H,  $J=7.6$  Hz, H<sub>c</sub>), 3.91 (1/2ABq, 1H,  $J=9.2$  Hz, N-CH<sub>f</sub>), 3.86 (1/2ABq, 1H,  $J=9.2$  Hz, N-CH<sub>g</sub>), 3.20 (ABq d, 1H,  $J=10.4$  Hz, H<sub>d</sub>), 2.97 (ABq d, 1H,  $J=10.4$  Hz, H<sub>e</sub>) ppm. **<sup>13</sup>C NMR** (100MHz, CDCl<sub>3</sub>),  $\delta_{\text{C}}$ : 161.5, 152.4, 147.0, 142.9, 142.5, 142.1, 141.3, 138.4, 132.2, 130.9, 129.9, 129.7, 129.2, 129.1, 126.0, 122.5, 110.1, 107.9, 85.6, 73.8 (spiro carbon), 68.0, 53.3, 51.0, 33.1 ppm. **MS**:  $m/z = 443$  [M<sup>+</sup> + 1]; Anal. Calcd. For C<sub>24</sub>H<sub>18</sub>N<sub>4</sub>O<sub>3</sub>S: C, 65.14; H, 4.10; N, 12.66. Found: C, 65.20; H, 4.15; N, 12.61.

**7'-nitro-6'-(thiophen-2-yl)-3',6',7',7a'-tetrahydro-1'H-spiro[indeno[1,2-b]quinoxaline-11,5'-pyrrolo[1,2-c]thiazole] (5l)**

Cream solid (0.38g, 85%); **mp**: 228-230°C. **IR** (KBr) ( $\nu_{\max}/\text{cm}^{-1}$ ): 1551, 1372. **<sup>1</sup>H NMR** (400MHz, CDCl<sub>3</sub>),  $\delta_{\text{H}}$ : 7.72-8.19 (m, 7H, ArH), 7.65 (t, 1H,  $J=7.2$  Hz, ArH), 6.75 (dd, 1H,  $J=4.8, 0.8$  Hz, thiophen), 6.70 (dd, 1H,  $J=10.8, 7.6$  Hz, H<sub>b</sub>), 6.49 (t, 1H,  $J=3.6$  Hz, thiophen), 6.45 (d, 1H,  $J=3.2$  Hz, thiophen), 5.04 (d, 1H,  $J=10.8$  Hz, H<sub>a</sub>), 4.90 (q, 1H,  $J=7.6$  Hz, H<sub>c</sub>), 3.94 (t, 2H,  $J=10$  Hz, N-CH<sub>f</sub>H<sub>g</sub>), 3.20 (ABq d, 1H,  $J=10.4$  Hz, H<sub>d</sub>), 3.03 (ABq d, 1H,  $J=10.8$  Hz, H<sub>e</sub>) ppm. **<sup>13</sup>C NMR** (100MHz, CDCl<sub>3</sub>),  $\delta_{\text{C}}$ : 161.6, 152.6, 142.6, 142.5, 141.3, 138.8, 134.6, 132.2, 131.0, 130.0, 129.6, 129.3, 129.2, 126.6, 126.3, 126.0, 125.3, 122.6, 88.0, 74.7 (spiro carbon), 67.8, 53.8, 53.0, 33.3 ppm. **MS**:  $m/z = 458$  [M<sup>+</sup>]; Anal. Calcd. For C<sub>24</sub>H<sub>18</sub>N<sub>4</sub>O<sub>2</sub>S<sub>2</sub>: C, 62.86; H, 3.96; N, 12.22. Found: C, 62.95; H, 4.07; N, 12.14.

**6'-(naphthalen-1-yl)-7'-nitro-3',6',7',7a'-tetrahydro-1'H-spiro[indeno[1,2-b]quinoxaline-11,5'-pyrrolo[1,2-c]thiazole] (5m)**

Light green solid (0.36g, 73%); **mp**: 226-228°C. **IR** (KBr) ( $\nu_{\max}/\text{cm}^{-1}$ ): 1544, 1374.  **$^1\text{H}$  NMR** (400MHz,  $\text{CDCl}_3$ ),  $\delta_{\text{H}}$ : 8.38 (d, 1H,  $J=7.6$  Hz, ArH), 8.23 (d, 1H,  $J=8$  Hz, ArH), 7.91 (d, 1H,  $J=8$  Hz, ArH), 7.35-7.79 (m, 9H, ArH), 7.23 (t, 1H,  $J=7.2$  Hz, ArH), 7.11 (t, 1H,  $J=7.2$  Hz, ArH), 6.90 (t, 1H,  $J=7.6$  Hz, ArH), 6.81 (dd, 1H,  $J=10, 7.2$  Hz,  $\text{H}_b$ ), 5.83 (d, 1H,  $J=10.4$  Hz,  $\text{H}_a$ ), 5.06 (q, 1H,  $J=6.8$  Hz,  $\text{H}_c$ ), 4.04 (1/2ABq, 1H,  $J=8.8$  Hz, N- $\text{CH}_f$ ), 3.90 (1/2ABq, 1H,  $J=8.8$  Hz, N- $\text{CH}_g$ ), 3.29 (ABq d, 1H,  $J=10.4$  Hz,  $\text{H}_d$ ), 3.17 (t, 1H,  $J=10$  Hz,  $\text{H}_e$ ) ppm.  **$^{13}\text{C}$  NMR** (100MHz,  $\text{CDCl}_3$ ),  $\delta_{\text{C}}$ : 161.7, 152.3, 143.6, 142.1, 141.0, 138.1, 133.4, 132.0, 131.8, 130.7, 129.9, 129.4, 129.2, 129.0, 128.5, 128.4, 128.3, 127.1, 126.1, 125.7, 125.3, 124.0, 122.5, 122.4, 88.0, 75.0 (spiro carbon), 68.5, 52.6, 51.7, 33.0 ppm. **MS**:  $m/z = 502$  [ $\text{M}^+$ ]; Anal. Calcd. For  $\text{C}_{30}\text{H}_{22}\text{N}_4\text{O}_2\text{S}$ : C, 71.69; H, 4.41; N, 11.15. Found: C, 71.79; H, 4.48; N, 11.08.

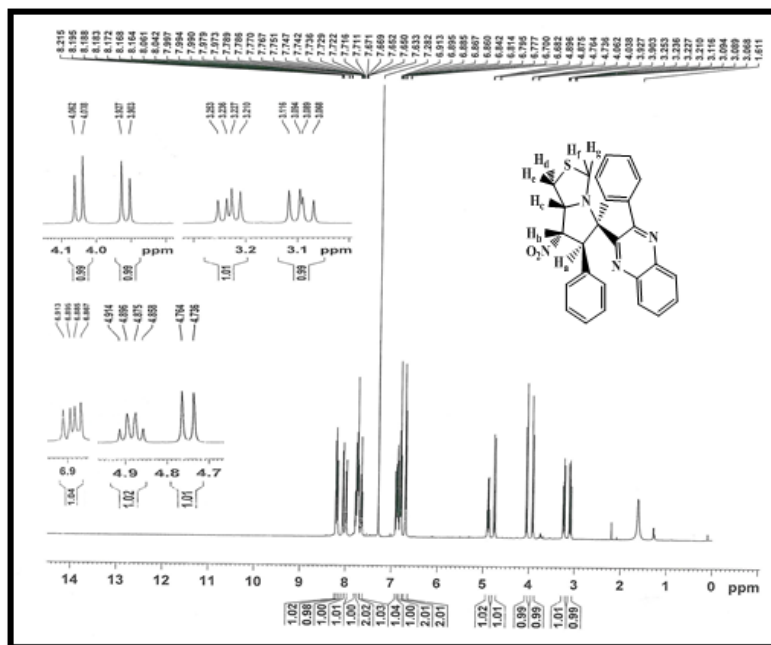

Fig. S1 . <sup>1</sup>H NMR spectrum of **5a** in CDCl<sub>3</sub>

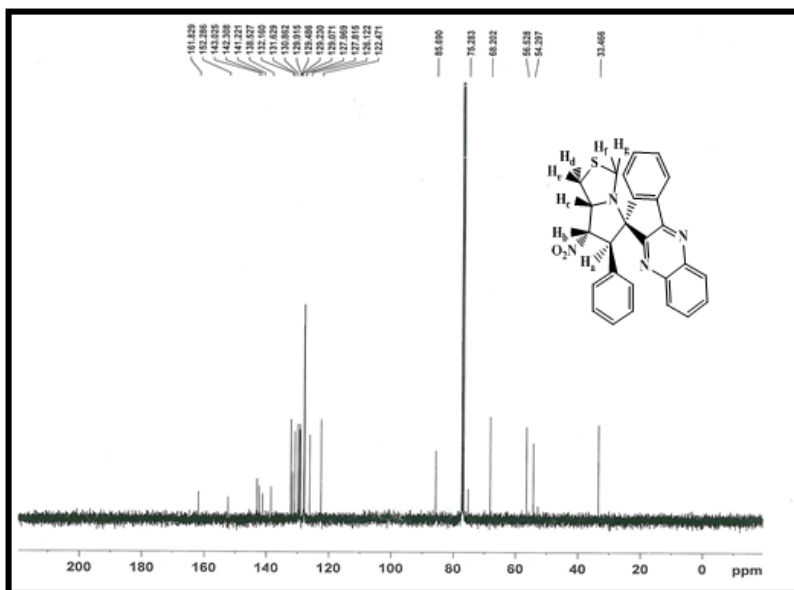

Fig. S2 . <sup>13</sup>C NMR spectrum of **5a** in CDCl<sub>3</sub>

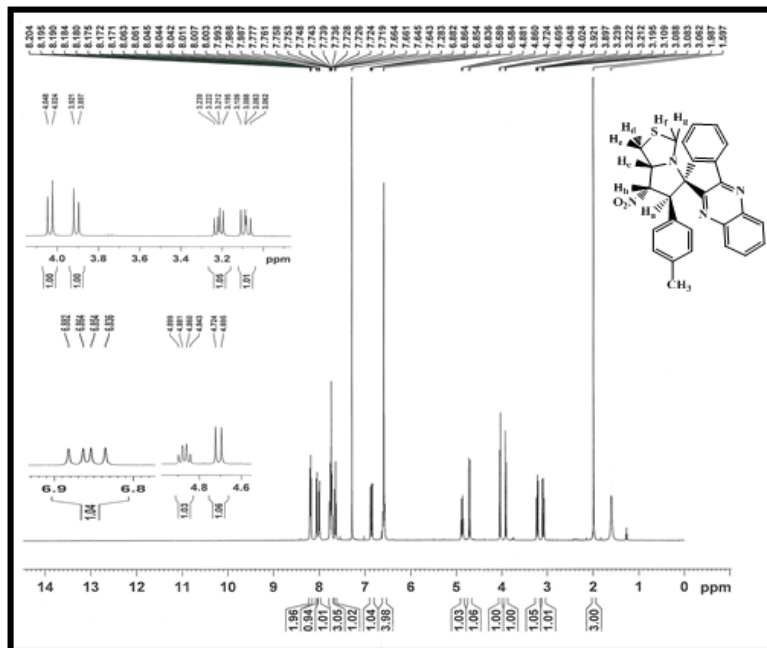

Fig. S3 . <sup>1</sup>H NMR spectrum of **5b** in CDCl<sub>3</sub>.

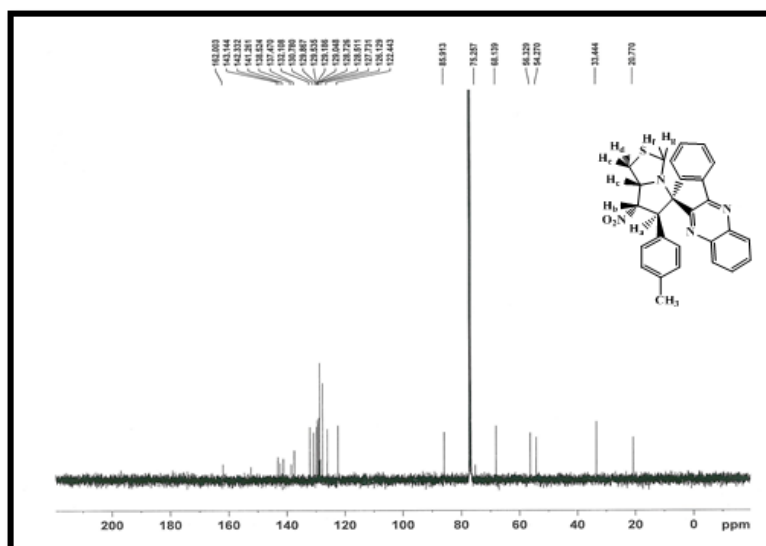

Fig. S4 . <sup>13</sup>C NMR spectrum of **5b** in CDCl<sub>3</sub>

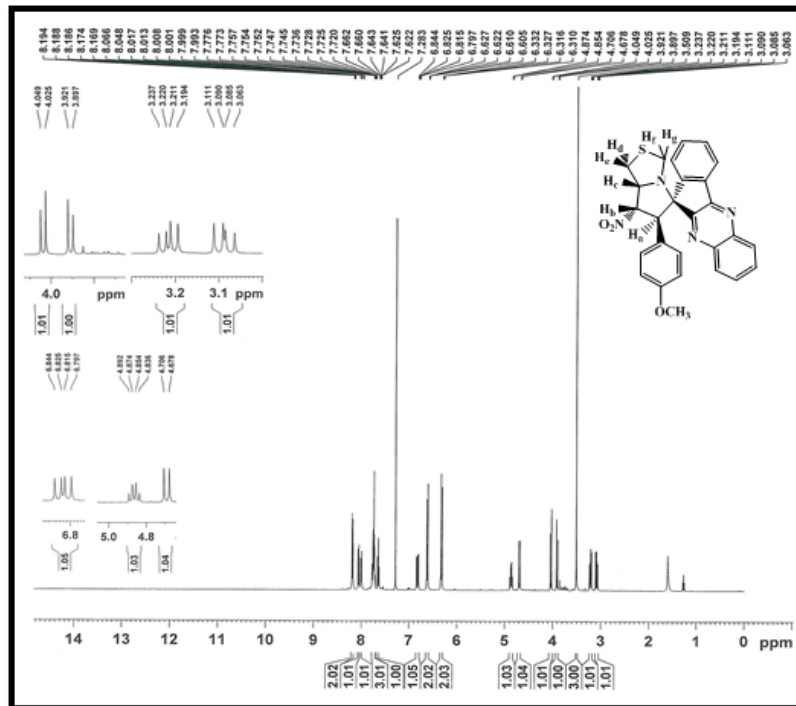

Fig. S5 .  $^1\text{H}$  NMR spectrum of **5c** in  $\text{CDCl}_3$

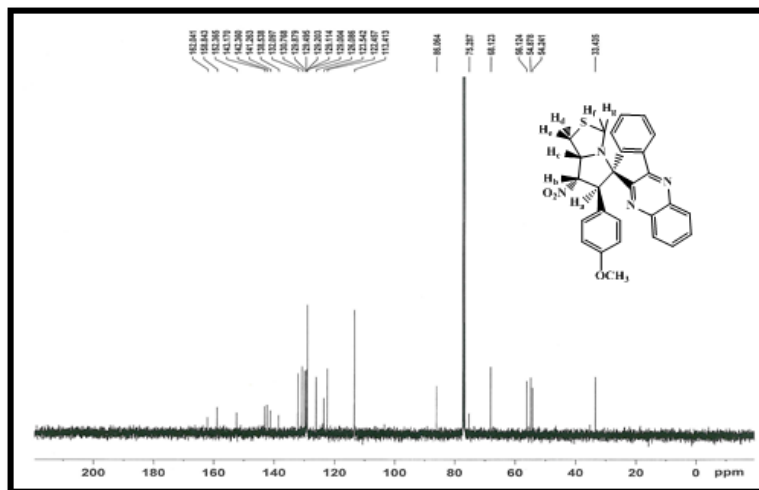

Fig. S6 .  $^{13}\text{C}$  NMR spectrum of **5c** in  $\text{CDCl}_3$







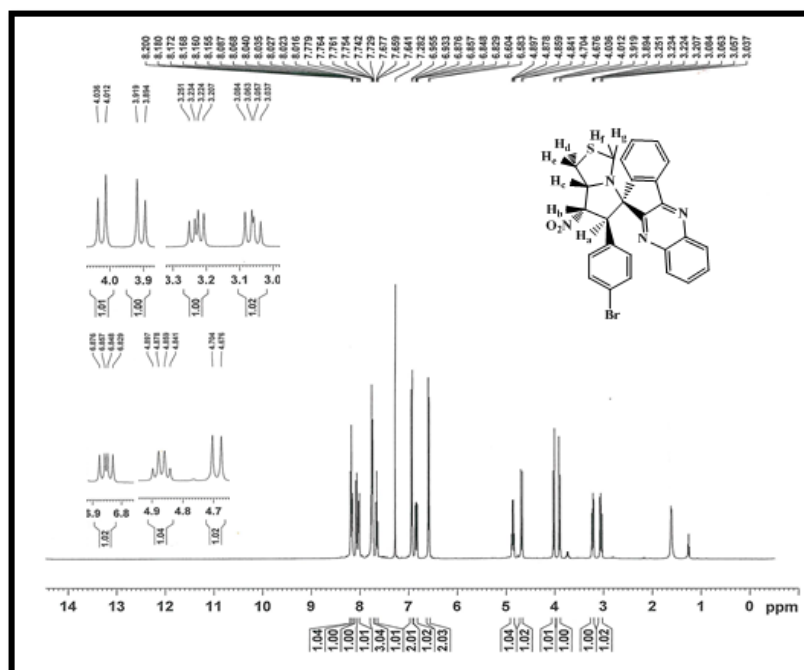

Fig. S11. <sup>1</sup>H NMR spectrum of **5f** in CDCl<sub>3</sub>

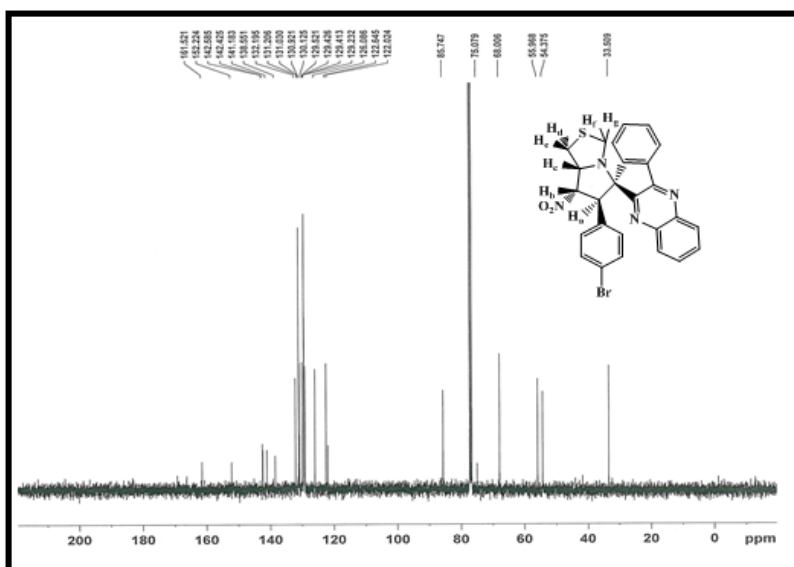

Fig. S12. <sup>13</sup>C NMR spectrum of **5f** in CDCl<sub>3</sub>

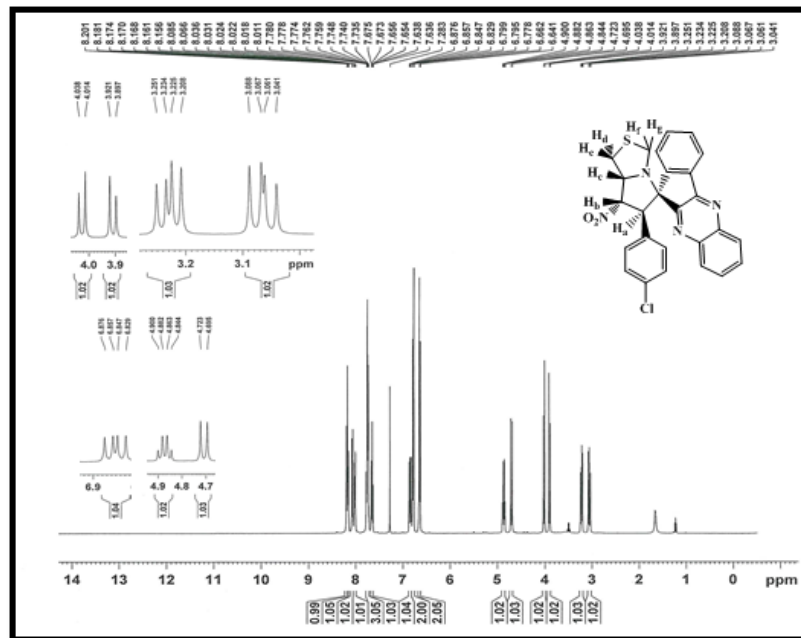

Fig. S13.  $^1H$  NMR spectrum of **5g** in CDCl<sub>3</sub>

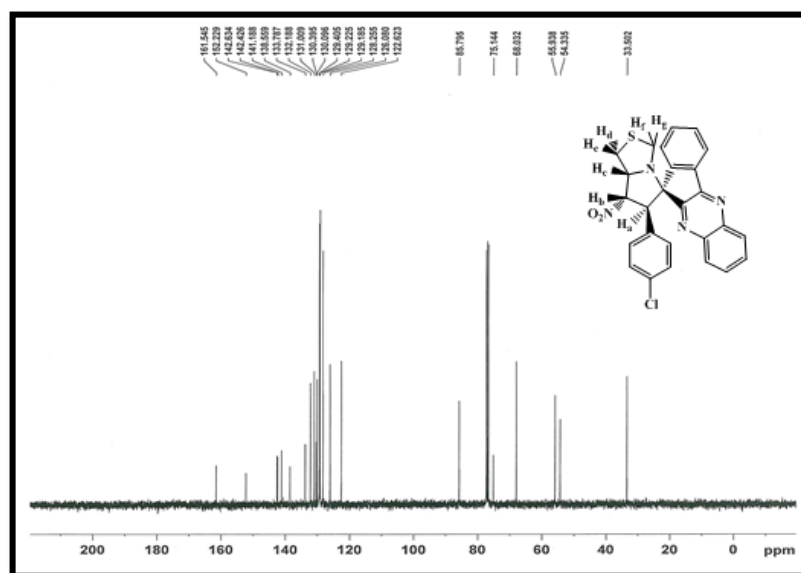

Fig. S14.  $^{13}C$  NMR spectrum of **5g** in CDCl<sub>3</sub>

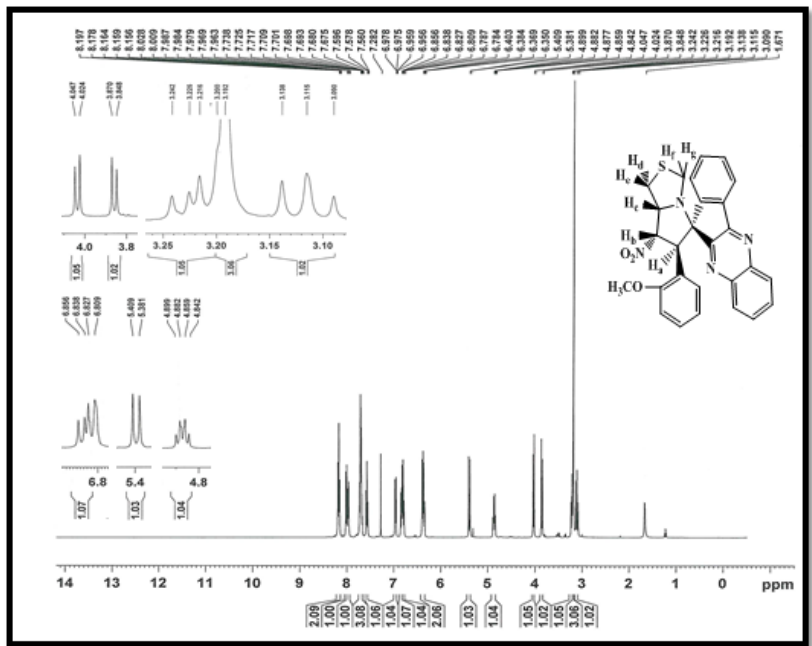

Fig. S15. <sup>1</sup>H NMR spectrum of **5h** in CDCl<sub>3</sub>

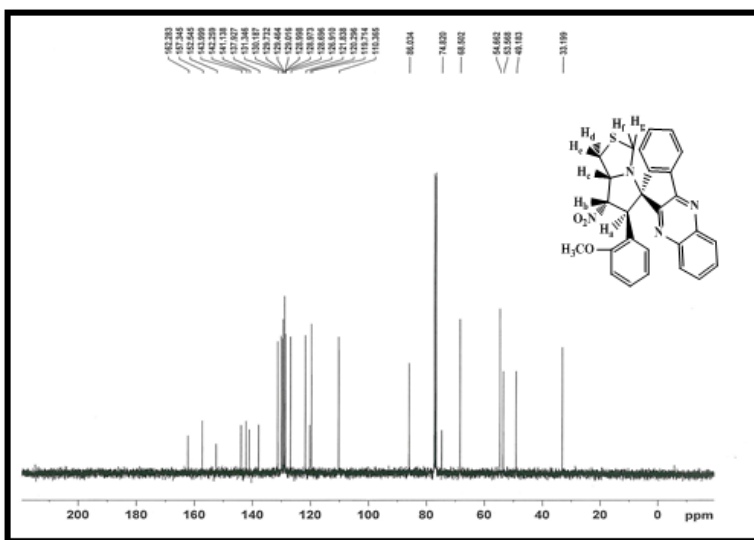

Fig. S16. <sup>13</sup>C NMR spectrum of **5h** in CDCl<sub>3</sub>

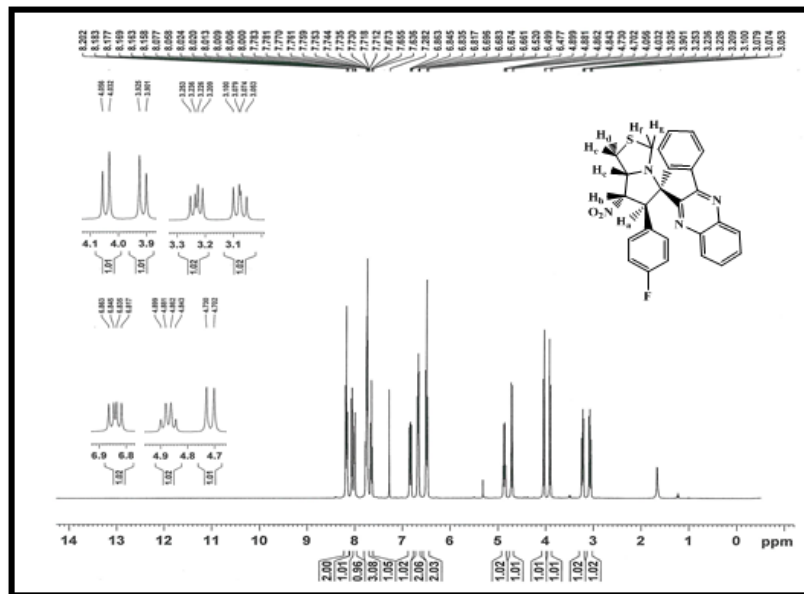

Fig. S17. <sup>1</sup>H NMR spectrum of **5i** in CDCl<sub>3</sub>

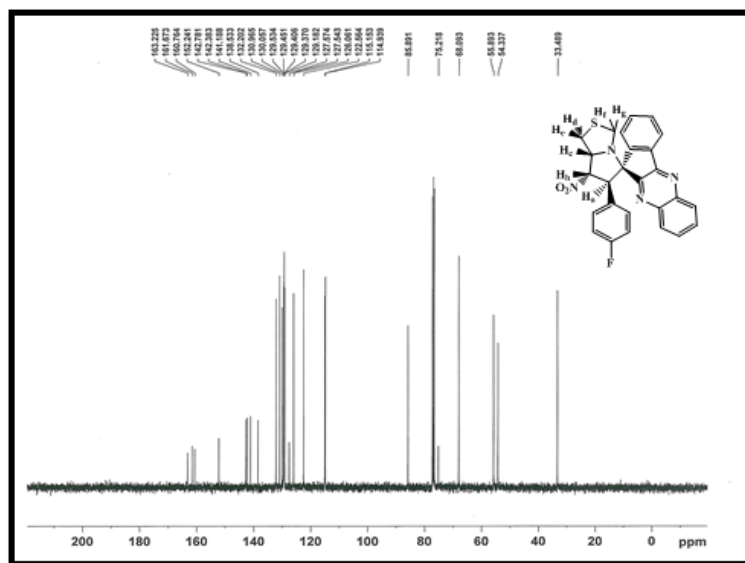

Fig. S18. <sup>13</sup>C NMR spectrum of **5i** in CDCl<sub>3</sub>

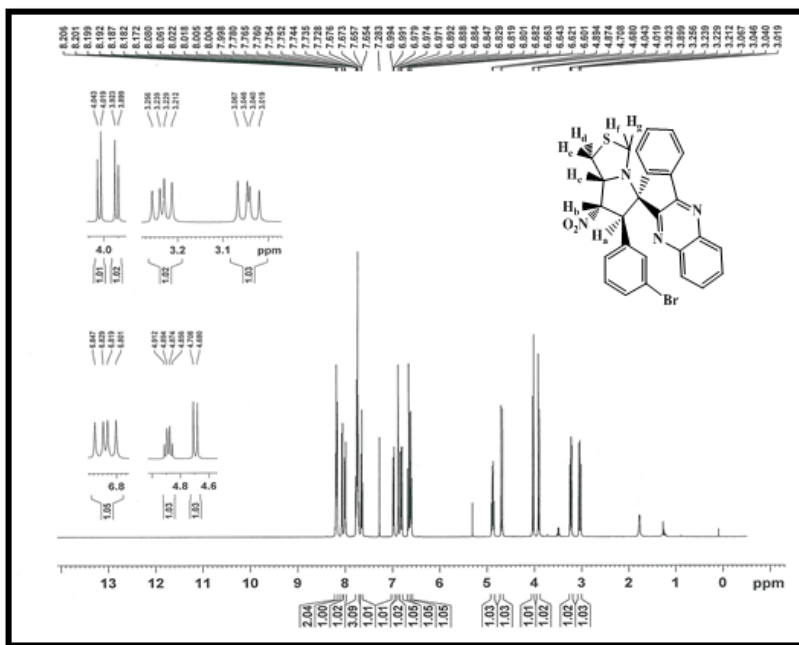

Fig. S19. <sup>1</sup>H NMR spectrum of **5j** in CDCl<sub>3</sub>

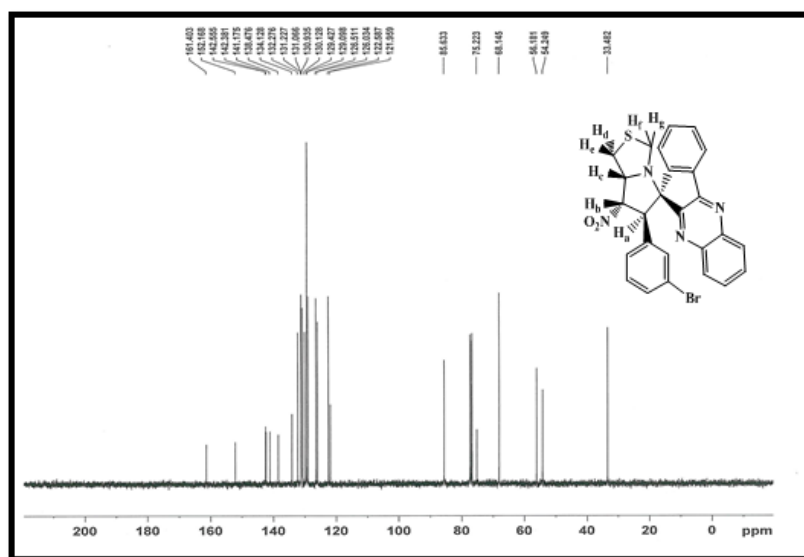

Fig. S20. <sup>13</sup>C NMR spectrum of **5j** in CDCl<sub>3</sub>

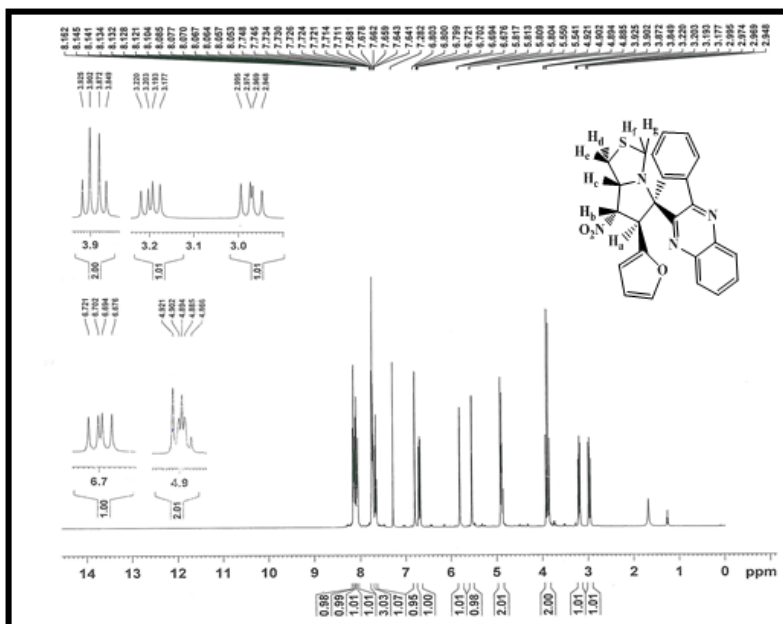

Fig. S21.  $^1H$  NMR spectrum of **5k** in  $CDCl_3$

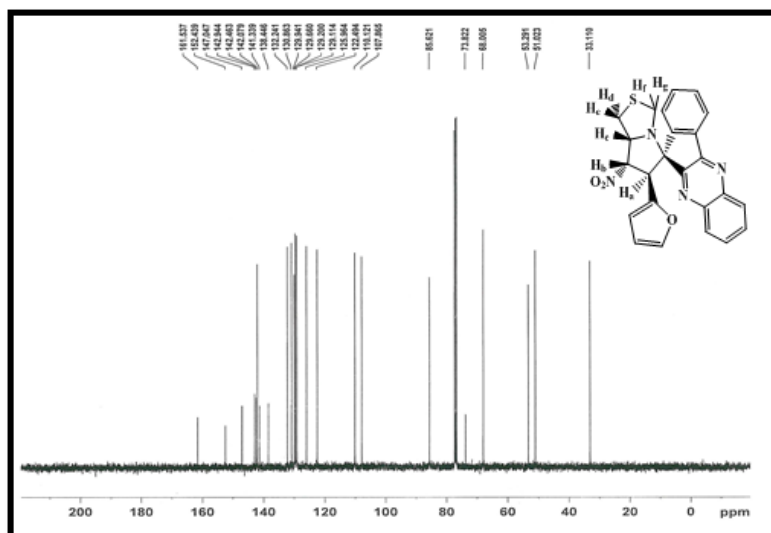

Fig. S22.  $^{13}C$  NMR spectrum of **5k** in  $CDCl_3$

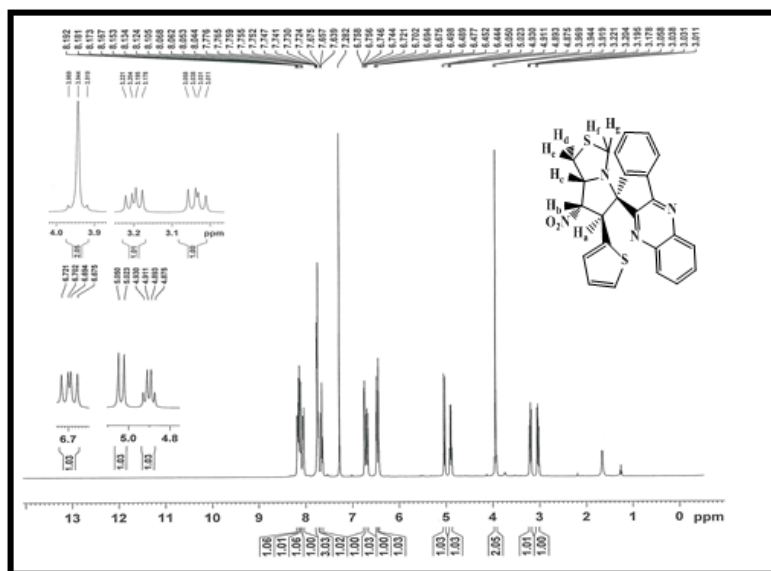



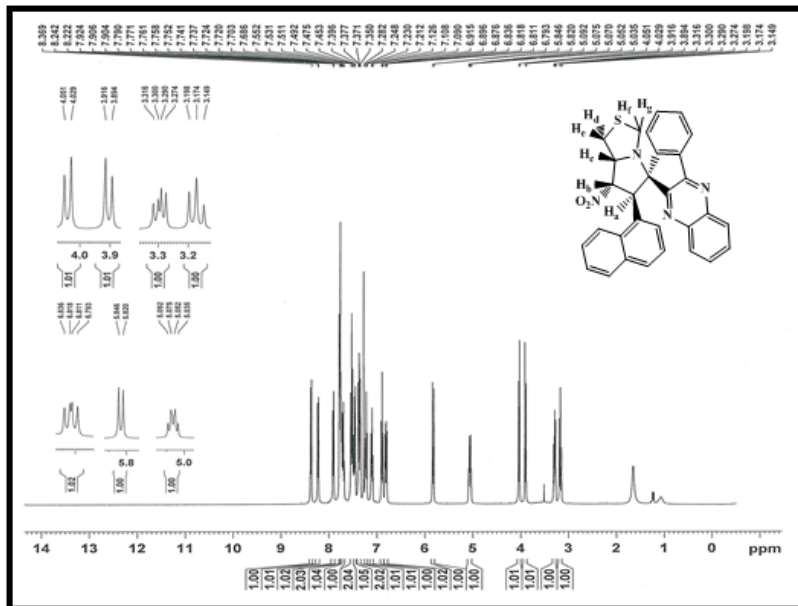

Fig. S25.  $^{13}\text{C}$  NMR spectrum of **5m** in  $\text{CDCl}_3$

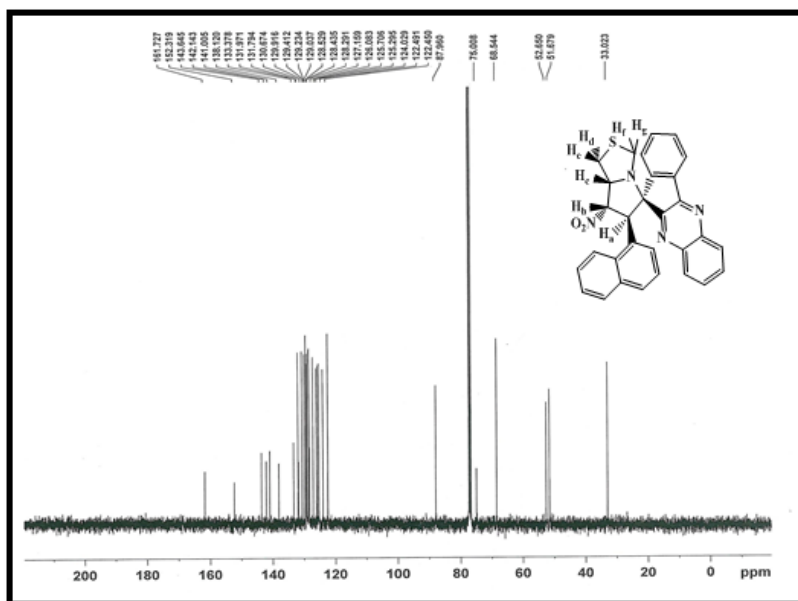

Fig. S26.  $^{13}\text{C}$  NMR spectrum of **5m** in  $\text{CDCl}_3$
